# Supplementary material for: Beyond graft function impairment after liver transplantation: the prolonged cold ischemia time impact on recurrence of hepatocellular carcinoma after liver transplantation—a single-center retrospective study
Source: PeerJ. 2024 Oct 4;12:e18126. doi: 10.7717/peerj.18126 (PMC11457873; doi:10.7717/peerj.18126)
Supplement: Supplemental Information 1 [file peerj-12-18126-s001.xlsx]

## Sheet: IRI and HCC recurrence Deletion
blood type（1O2A3B4AB）	Recipient gender（0 male，1 female）	Recipient age	Recipient height	Recipient weight	BMI	Hypertension	coronary heart disease	Diabetes	Preoperative ALT	Preoperative AST	Preoperative LDH	History of chemotherapy（0 yes，1 no）	Postoperative EAD	Postoperative biliary complications	Postoperative rejection (<30 days)	Tumor recurrence（2 yes，1 no）	Receptor survival (1 death event occurred)	Date of recurrence OR last follow-up date	Last follow-up date	Preoperative AFP	Preoperative AFP grouped（1=≥400ng/ml）	Number of tumors (4 means more than 3)	Maximum tumor diameter(cm)	PV cancer embolism (0 no, 1 yes)	Milan standard (1 over 0 within)	UCSF standards (0 over 1 within)	Hangzhou Standard	TACE treatment (0 no, 1 yes)	Ablation therapy (0 no, 1 yes)	History of hepatectomy (0 no, 1 yes)	Tumor grading	Poorly differentiated	vascular invasion (0 without, 1 with)	creatinine	TBil	INR	MELD	ChildPugh）	ALTPOD1	ALTPOD2	ALTPOD3	ALTPOD4	ALTPOD5	ALTPOD6	ALTPOD7	ALTpeak	ALTpeak（填补缺失值）	ASTPOD1	ASTPOD2
3	0	32	170	70	24.2215	0	0	0	34	32	192	0	0	0	0	2	0	2020-11-10	2020-11-10	237.38	1	4	4.9	0	1	0	1	1	1	1	2	0	0	81	24.3	1.01	8	5	599	370	239	161	135	112	171	599	599	1368	445
2	0	62	168	75	26.5731	0	0	1	28	31	260	0	0	0	0	2	0	2020-12-18	2020-12-18	240.03	1	1	6	0	1	1	1	0	0	0	2	0	0	66	12.4	1.11	14.5666	#NULL!	#NULL!	747	587	520	369	240	194	#NULL!	957.08	#NULL!	471
4	0	44	175	67	21.8776	0	0	0	21	26	197	0	0	0	0	2	0	2021-03-29	2021-03-29	247.92	1	4	3.7	0	1	0	1	0	0	0	2	0	0	76	19.7	1.31	10	6	341	299	182	123	88	69	56	341	341	874	356
2	0	66	152	48	20.7756	0	0	0	37	29	172	0	0	0	0	2	0	2021-07-07	2021-07-07	344.24	1	3	3.5	0	1	1	1	1	0	0	2	0	0	53	20.8	1.1	30	9	2880	1321	1287	702	413	233	155	2880	2880	5614	1924
4	0	46	167	61	21.8724	0	0	0	18	48	236	0	1	0	0	2	0	2020-12-14	2020-12-14	449.64	1	1	8	1	1	0	0	0	1	1	2	0	1	83	12.9	0.98	6	5	765	580	417	309	283	261	232	765	765	1297	420
1	0	63	162	54	20.5761	0	0	0	178	71	429	0	1	0	0	2	0	2021-03-09	2021-03-09	501.22	1	1	7	0	1	0	1	0	0	0	2	0	0	69	12.9	1.21	9	11	705	309	271	228	187	157	124	705	705	2359	2106
3	0	63	169	62	21.7079	0	0	0	22	32	171	0	0	0	0	2	0	2021-07-19	2021-07-19	623.78	1	2	5	0	1	0	0	1	0	0	2	0	0	70	41.2	1.47	14	8	221	2391	2221	981	588	376	289	2391	2391	1099	783
1	0	46	167	71	25.4581	0	0	0	101.272	183.668	592.736	1	0	0	0	2	1	2019-12-05	2019-12-05	790.51	1	2	7	0	1	0	1	0	1	0	2	0	0	78	12.7	1.14	8	8	243	503	375	247	168	265	551	551	551	127	94
1	0	45	168	55	19.487	0	0	0	101.272	183.668	592.736	0	1	0	0	2	1	2018-07-15	2018-07-15	801.43	1	4	3	1	1	0	0	1	0	0	2	0	1	34	31	1.37	12	7	1604	480	284	231	210	0	134	1604	1604	3369	12464
2	0	65	168	58	20.5499	0	0	0	101.272	183.668	592.736	0	0	0	0	2	0	2021-08-10	2021-08-10	1219.84	1	1	8.3	0	1	0	0	0	0	0	2	0	0	290	256	2	36	11	#NULL!	455	309	194	116	81	54	455	455	259	106
3	0	39	176	71	22.921	0	0	0	11	16	153	0	0	0	0	2	0	2020-12-08	2020-12-08	1291.34	1	1	2.6	0	1	1	1	0	1	0	2	0	0	68	10	1.07	7	5	319	218	179	129	88	56	42	319	319	743	267
1	0	62	182	75	22.6422	0	0	0	49	61	168	0	0	0	0	2	0	2021-03-02	2021-03-02	1431.08	1	3	3.8	0	1	1	1	1	0	0	2	0	0	59	23.6	0.92	8	7	421	99	50	21	10	7	3	421	421	1732	979
2	0	51	174	60	19.8177	1	0	0	84	134	1020	0	1	0	0	2	1	2021-02-04	2016-07-14	2396.41	1	4	7	1	1	0	0	0	0	0	2	0	0	873	824.7	2.08	40	7	669	571	378	307	212	186	127	669	669	5192	1389
3	0	58	158	65	26.0375	1	0	1	101.272	183.668	592.736	0	1	0	0	2	1	2016-07-14	2015-05-19	2567.55	1	2	6	0	1	0	0	0	0	0	2	0	0	781	413.6	1.01	32	7	1063	1559	856	535	304	178	110	1559	1559	12696	4728
1	0	58	168	55	19.487	0	0	0	45	164	219	0	0	0	0	2	0	2021-03-30	2021-03-30	6902.65	1	3	10	0	1	0	0	1	1	1	2	0	0	69	27.9	1.07	9	6	134	64	56	61	65	44	29	134	134	492	90
3	0	36	169	69	24.1588	0	0	0	31	26	208	0	1	0	0	2	0	2021-04-26	2021-04-26	18997.4	1	3	8.8	0	1	0	0	1	0	0	2	0	0	74	12.1	1.16	8	8	1595	1119	746	405	250	175	109	1595	1595	4730	6875
2	0	66	175	76	24.8163	0	0	0	77	238	362	0	0	0	0	2	0	2021-01-01	2021-01-01	19701	1	4	7.8	0	1	0	0	0	0	0	2	0	0	54	48.2	1.45	15	8	240	152	95	70	56	50	46	240	240	1441	305
1	0	52	170	82	28.3737	0	0	0	19	45	270	0	1	0	0	2	1	2018-06-20	2018-06-20	22270.6	1	1	13	1	1	0	0	0	0	0	2	0	1	76	19.2	0.97	7	5	1249	1370	688	373	175	92	55	1370	1370	3562	3008
2	0	38	169	50.5	17.6815	0	0	0	342	143	384	0	1	0	0	2	0	2020-12-10	2020-12-10	52232.3	1	1	10	0	1	0	1	1	0	0	2	0	1	67	25.2	1.16	10	6	827	304	158	89	54	33	41	827	827	3353	376
2	0	21	175	60	19.5918	0	0	0	825	407	313	0	0	0	0	2	0	2021-04-01	2021-04-01	63898.8	1	4	6.8	1	1	0	0	0	0	0	2	0	1	57	27.3	1.2	24	7	648	505	402	288	196	167	116	648	648	1131	519
1	0	21	164	55	20.4491	0	0	0	30	62	277	0	1	0	1	2	0	2019-02-15	2019-02-15	2000000	1	1	30	1	1	0	0	0	0	0	2	0	1	70	41.2	0.99	10	6	1022	53	32	21	20	18	16	1022	1022	3537	988
1	1	48	158	55	22.0317	0	0	0	19	38	136	0	0	0	0	2	0	2020-12-25	2020-12-25	347.81	1	2	3.3	0	1	1	1	0	0	0	1	0	0	47	38.7	1.29	12	8	2054	#NULL!	#NULL!	#NULL!	#NULL!	#NULL!	#NULL!	#NULL!	957.08	4745	813
2	1	31	173	70	23.3887	0	0	0	92	39	210	0	1	1	0	2	1	2021-01-15	2017-03-14	7488.3	1	4	4	0	1	0	0	1	0	1	2	0	0	151	162.1	3.05	33	9	711	448	255	143	94	91	102	711	711	171	106
3	0	53	175	90	29.3878	1	0	0	19	28	239	0	1	0	0	2	0	2021-07-26	2021-07-26	241.75	1	2	4	0	1	1	1	0	0	0	3	1	1	78	49.1	1.11	12	8	1639	970	652	469	314	209	155	1639	1639	3099	355
2	0	41	168	57.5	20.3727	0	0	0	13	31	276	1	0	1	1	2	0	2021-06-29	2021-06-29	402.74	1	4	3	0	1	0	1	0	0	0	3	1	1	3.4	11.1	1.12	6	7	216	154	1118	136	141	139	145	1118	1118	433	136
4	0	49	168	74	26.2188	0	0	0	27	20	163	0	0	0	0	2	0	2021-04-29	2021-04-29	520.48	1	4	1.5	0	1	0	0	1	1	0	3	1	0	53	16.6	1.19	8	5	518	279	258	344	426	381	206	518	518	988	152
2	0	59	183	65	19.4094	0	0	0	55	37	224	0	0	0	0	2	0	2021-03-29	2021-03-29	664.06	1	4	3	0	1	0	0	1	0	0	3	1	0	73	37.6	1.48	14	8	754	467	272	168	137	78	36	754	754	1233	1349
4	0	45	176.5	75	24.0753	0	0	0	60	58	206	0	1	0	0	2	0	2021-05-19	2021-05-19	1228.21	1	1	3	1	1	0	0	1	1	0	3	1	0	54	22.6	1.07	8	5	1186	0	76	65	60	63	63	1186	1186	5315	3904
2	0	60	165	72	26.4463	1	0	0	35	28	203	0	0	0	0	2	0	2021-04-12	2021-04-12	1806.83	1	4	3.9	1	1	0	0	1	0	0	3	1	0	64	22.2	1.31	10	7	553	328	192	126	85	58	43	553	553	803	520
2	0	49	166	67	24.3141	0	0	0	56	135	201	0	0	0	0	2	0	2021-03-11	2021-03-11	2193.75	1	2	6.8	0	1	0	0	1	0	0	3	1	0	69	188.6	1.62	21	11	97	71	58	52	43	43	47	97	97	329	126
3	0	28	177	52.5	16.7576	0	0	0	191	118	235	0	0	0	0	2	0	2021-03-22	2021-03-22	2500	1	2	5	0	1	0	1	0	0	0	3	1	0	166	386.4	1.75	31	9	206	#NULL!	#NULL!	#NULL!	#NULL!	#NULL!	#NULL!	206	206	475	226
1	0	43	174	80	26.4236	0	0	0	14	35	247	0	1	0	0	2	0	2021-04-12	2021-04-12	2517	1	3	4	0	1	0	0	0	0	0	3	1	1	72	24.9	0.97	13	8	859	918	638	413	278	190	121	918	918	4004	2025
3	0	60	167	53	19.0039	0	0	0	24	32	225	0	0	0	0	2	0	2021-07-07	2021-07-07	2751.15	1	3	8.5	1	1	0	0	0	0	0	3	1	1	78	50.9	1.26	6	9	284	177	122	128	141	116	120	284	284	573	101
2	0	35	170	66	22.8374	0	0	0	72	118	457	0	0	0	0	2	1	2019-09-03	2019-12-23	3572.05	1	4	16	1	1	0	0	0	0	0	3	1	1	166	468	2.28	34	9	936	611	469	318	238	175	119	936	936	1596	461
3	0	35	165	105	38.5675	0	0	0	82	152	283	0	0	0	0	2	0	2021-05-17	2021-05-17	3658	1	3	9	0	1	0	0	0	0	0	3	1	1	80	19.8	1.1	30	10	572	393	263	186	143	116	98	572	572	1076	270
2	0	50	158	46	18.4265	0	0	0	255	513	1035	0	0	0	0	2	0	2021-04-28	2021-04-28	7008.73	1	4	11	0	1	0	0	0	0	0	2	1	1	182	16.2	0.94	13	6	255	187	109	75	46	26	17	255	255	513	300
2	0	43	174	78	25.763	0	0	0	42	61	351	0	1	0	0	2	0	2021-03-25	2021-03-25	8486.89	1	1	7.3	1	1	0	0	1	0	0	3	1	1	68	64	1.18	13	7	952	601	373	259	200	146	78	952	952	4889	1143
1	0	50	173	88	29.4029	0	0	0	52	49	207	0	0	0	0	2	0	2021-07-16	2021-07-16	13818.3	1	1	7.5	0	1	0	1	0	0	0	3	1	0	88	17.9	1.04	7	8	615	559	529	545	609	466	379	615	615	921	522
1	0	62	168	67	23.7387	0	0	0	27	150	273	0	0	0	0	2	0	2021-07-05	2021-07-05	22094.1	1	3	8	0	1	0	1	1	1	0	3	1	1	68	477.2	1.72	23	12	521	412	368	#NULL!	150	117	62	#NULL!	957.08	1021	387
2	0	54	176	72	23.2438	0	0	0	101.272	183.668	592.736	1	0	0	0	2	0	2021-08-12	2021-08-12	22094.1	1	2	2.1	1	1	0	0	0	1	1	3	1	1	78	9.7	0.98	6	7	425	191	120	97	78	93	96	425	425	280	110
1	0	30	170	68	23.5294	0	0	0	101.272	183.668	592.736	0	0	0	0	2	1	2020-10-22	2020-10-22	43520	1	3	3.9	0	1	1	1	0	0	1	3	1	0	70	20.8	1.07	8	7	524	424	346	268	196	144	112	524	524	1030	923
3	0	28	178	54	17.0433	0	0	0	63	275	520	0	0	0	0	2	0	2021-03-25	2021-03-25	216682	1	4	19.2	1	1	0	0	1	0	0	3	1	1	68	16.6	1.32	10	5	652	646	411	246	160	125	99	652	652	1257	606
1	0	58	168	75	26.5731	0	0	0	46	106	225	0	0	0	0	2	0	2021-05-31	2021-05-31	583776	1	4	11	1	1	0	0	0	0	0	3	1	1	66	75.7	1.59	13	11	1312	644	367	219	147	102	70	1312	1312	1796	485
1	1	62	163	57.5	21.6418	0	0	0	13	40	206	0	0	0	0	2	0	2021-07-23	2021-07-23	304.4	1	4	5	1	1	0	0	1	0	0	4	1	1	79	16.9	1.09	7	5	491	519	349	308	250	270	205	519	519	1214	1595
1	1	62	155	62	25.8065	1	1	0	10	65	210	0	0	1	0	2	0	2021-04-30	2021-04-30	1346.51	1	1	11.6	0	1	0	0	1	0	0	3	1	0	76	12	1.12	8	6	794	444	404	226	141	100	72	794	794	2431	1043
3	1	63	160	75	29.2969	1	0	1	25	85	218	0	0	0	0	2	0	2021-07-16	2021-07-16	8218.11	1	2	6	0	1	0	1	0	0	0	3	1	0	34	363.5	1.48	22	7	169	475	340	209	130	88	93	475	475	860	416
1	1	67	178	68	21.4619	1	0	1	27	46	230	0	0	0	0	2	0	2021-05-07	2021-05-07	22094.1	1	2	4.5	0	1	1	1	0	1	1	3	1	0	63	138	1.36	25	12	141	100	99	102	113	84	69	141	141	108	73
3	1	62	178	58	18.3058	1	0	0	39	91	238	0	0	0	0	2	1	2019-11-20	2020-01-03	36737.3	1	5	10	0	1	0	0	0	0	0	3	1	1	70	11.9	0.94	6	8	382	150	123	131	118	131	150	382	382	568	530
3	0	63	168	70	24.8016	0	0	0	17	35	248	0	0	0	0	2	0	2020-11-11	2020-11-11	1.39	0	4	2.9	0	1	0	1	1	1	1	2	0	0	104	20.2	1.05	9	5	944	936	504	#NULL!	250	179	132	944	944	6041	6726
3	0	69	174	60	19.8177	0	0	0	67	73	231	0	0	0	0	2	0	2021-07-02	2021-07-02	1.45	0	1	8	1	1	0	0	0	0	0	2	0	0	92	19.3	1.18	9	9	207	140	73	50	35	28	21	207	207	1132	297
3	0	48	155	56	23.3091	0	0	0	101.272	183.668	592.736	0	0	0	0	2	0	2021-02-04	2021-02-04	1.47	0	1	12.6	0	1	0	1	1	0	0	2	0	0	55	10	1.09	7	8	412	141	83	54	42	37	39	412	412	923	960
2	0	44	170	60	20.7612	0	0	1	34	20	151	0	0	0	0	2	0	2021-07-27	2021-07-27	1.91	0	4	2	0	1	0	1	0	0	1	2	0	0	60	9.6	1.04	7	5	644	411	328	229	170	132	97	644	644	1159	307
3	0	52	177	60	19.1516	0	0	0	14	26	208	0	0	0	0	2	0	2021-04-29	2021-04-29	2	0	2	4.1	0	1	1	1	0	0	0	2	0	0	55	15.5	1.18	8	6	192	150	106	78	66	53	51	192	192	236	133
1	0	44	170	59	20.4152	0	0	0	17	28	230	0	0	0	0	2	0	2021-04-26	2021-04-26	2.06	0	2	3	0	1	1	1	1	1	0	2	0	0	52	39.3	1.36	13	10	986	561	360	268	174	125	82	986	986	1252	231
3	0	49	170	65	22.4913	0	0	0	49	64	199	0	0	0	0	2	0	2021-05-21	2021-05-21	2.1	0	2	2	1	1	0	0	0	0	0	2	0	0	72	57.7	1.23	14.5666	#NULL!	816	478	356	278	194	165	166	816	816	1340	364
1	0	66	170	67	23.1834	1	0	0	27	93	241	0	0	0	0	2	0	2021-04-15	2021-04-15	2.28	0	4	1	0	1	0	1	0	0	0	2	0	0	213	118.1	1.35	26	8	390	229	151	128	112	108	347	390	390	937	268
2	0	63	168	52	18.424	0	0	0	28	44	139	0	0	1	0	2	0	2021-08-06	2021-08-06	2.37	0	4	4.5	0	1	0	1	0	0	0	2	0	0	74	37.3	1.37	13	8	74	832	507	281	164	124	87	832	832	546	300
1	0	52	170	75	25.9516	1	0	0	27	35	324	0	0	0	0	2	0	2021-04-13	2021-04-13	2.38	0	1	10	0	1	0	1	1	0	0	2	0	0	240	16.4	1.12	21	6	170	351	226	162	108	77	62	351	351	987	1686
1	0	50	162	84	32.0073	1	0	0	13	22	223	0	0	0	0	2	0	2021-04-13	2021-04-13	2.43	0	1	4.7	1	1	0	0	0	0	0	2	0	0	95	17.1	1.15	9	6	463	263	136	67	36	23	17	463	463	4848	1054
3	0	45	178	80	25.2493	0	0	0	211	56	441	0	0	1	0	2	1	2019-04-10	2019-04-10	2.51	0	4	11.8	0	1	0	1	1	0	0	2	0	0	166	699	1.32	30	10	2176	5097	3168	1726	1242	1049	639	5097	5097	4690	6449
1	0	46	180	70	21.6049	0	0	1	20	40	287	0	0	0	0	2	0	2021-04-14	2021-04-14	2.53	0	4	2.3	0	1	0	1	0	0	0	2	0	0	260	366.8	2.17	37	9	302	286	211	152	116	87	74	302	302	959	369
3	0	69	165	59	21.6713	0	0	0	10	13	144	0	0	0	0	2	0	2020-12-14	2020-12-14	2.61	0	4	10.5	0	1	0	1	1	0	0	2	0	0	87	6.3	0.98	6	6	654	391	283	216	192	141	100	654	654	1882	394
3	0	37	170	61	21.1073	0	0	0	66	62	209	0	0	0	0	2	0	2021-04-09	2021-04-09	2.67	0	4	1.3	0	1	0	1	0	1	1	2	0	0	60	48	1.32	13	7	248	151	148	120	81	58	43	248	248	257	123
1	0	61	184	86	25.4017	1	0	1	101.272	183.668	592.736	0	0	0	0	2	0	2021-05-03	2021-05-03	2.76	0	2	5.1	0	1	0	1	0	1	1	2	0	0	64	6.7	1.17	8	10	180	119	117	81	58	55	48	180	180	261	125
3	0	59	156	52	21.3675	0	0	0	28	62	276	0	0	0	1	2	0	2021-05-28	2021-05-28	2.76	0	4	4.9	0	1	0	1	0	1	0	2	0	0	103	17.3	1.1	32	11	600	619	385	252	182	146	131	619	619	1095	457
1	0	52	170	62	21.4533	1	0	0	45	45	224	0	0	0	0	2	0	2020-11-26	2020-11-26	2.83	0	4	4.1	0	1	0	1	1	0	0	2	0	0	76	8.6	1.08	7	5	147	137	108	98	98	95	45	147	147	288	177
1	0	56	172	70	23.6614	1	0	0	103	132	243	0	0	0	0	2	0	2020-11-19	2020-11-19	2.9	0	4	2.8	0	1	0	1	0	0	1	2	0	0	58	29.7	1.18	10	5	475	314	241	173	129	104	82	475	475	830	246
3	0	46	152	49	21.2084	0	0	0	30	26	149	0	0	0	0	2	0	2020-12-29	2020-12-29	3.21	0	4	2.2	0	1	0	1	1	1	1	2	0	0	53	4.8	1.08	7	6	290	186	110	71	64	49	37	290	290	624	160
3	0	65	178	84	26.5118	0	0	0	19	31	264	0	0	0	0	2	0	2021-03-11	2021-03-11	3.24	0	4	2.8	0	1	0	1	1	0	0	2	0	0	93	24.3	1.13	10	9	19	144	93	57	34	21	14	144	144	31	416
4	0	63	167	57	20.4382	0	0	0	131	194	198	0	1	0	1	2	1	2019-09-07	2019-09-07	3.38	0	4	2	0	1	0	1	1	0	0	2	0	0	168	484	2.68	36	10	402	233	144	120	93	136	122	402	402	620	130
2	0	35	168	75	26.5731	0	0	0	17	34	499	0	1	0	0	2	0	2021-06-22	2021-06-22	3.73	0	4	6	0	1	0	1	0	0	0	1	0	0	46	168.1	2.17	24	10	256	712	426	292	231	207	179	712	712	576	57
3	0	57	165	54.5	20.0184	0	0	0	209	82	477	0	0	0	1	2	0	2020-04-23	2020-04-23	4.18	0	1	1	1	1	0	0	0	0	0	1	0	0	55	28.1	1.01	8	5	141	79	56	44	30	22	17	141	141	142	51
4	0	56	173	51	17.0403	0	0	0	59	55	173	0	0	0	0	2	0	2021-06-30	2021-06-30	4.51	0	2	4.5	0	1	1	1	1	1	0	2	0	0	67	31.8	0.95	17	10	457	323	180	122	94	58	44	457	457	1500	328
2	0	39	170	65.5	22.6644	0	0	0	40	49	217	0	0	0	0	2	0	2020-12-09	2020-12-09	4.63	0	2	3.8	0	1	1	1	0	0	0	2	0	0	70	19.9	1.41	11	7	918	1040	893	727	347	258	141	1040	1040	1759	1153
4	0	51	170	74	25.6055	0	0	0	30	29	174	0	0	0	0	2	0	2021-04-09	2021-04-09	4.78	0	4	0.7	0	1	0	1	1	1	0	1	0	0	80	10.5	1.05	7	6	4141	631	436	258	169	103	73	4141	4141	3753	1134
2	0	36	170	71	24.5675	0	0	0	562	707	1407	0	0	0	0	2	0	2020-12-30	2020-12-30	4.82	0	2	6.5	0	1	0	1	1	0	0	2	0	0	90	16.9	1.32	10	7	434	368	266	190	167	127	32	434	434	514	280
1	0	47	170	65	22.4913	0	0	0	54	52	223	0	0	0	0	2	0	2020-12-19	2020-12-19	4.86	0	2	5.5	0	1	0	1	1	1	0	2	0	0	83	40.4	1.08	11	6	1263	632	423	297	219	150	119	1263	1263	2574	658
2	0	60	178	75	23.6713	0	0	1	24	36	245	0	0	0	0	2	0	2021-07-16	2021-07-16	4.92	0	#NULL!	0	0	1	0	1	1	0	1	2	0	0	48	12.7	0.98	12	6	1851	1104	499	255	170	94	60	1851	1851	2181	579
1	0	58	174	81.5	26.919	1	0	0	156	138	311	0	1	0	0	2	1	2021-01-22	2021-01-22	5.28	0	4	5	0	1	0	1	1	0	1	2	0	0	77	18.7	1.15	8	5	876	96	65	82	120	124	96	876	876	3660	767
1	0	75	168	67	23.7387	1	0	0	15	33	215	0	0	0	0	2	0	2021-02-08	2021-02-08	5.47	0	4	17	0	1	0	1	0	0	0	1	0	0	75	20.7	1.05	8	5	995	295	114	62	52	69	74	995	995	1619	817
1	0	48	170	70	24.2215	0	0	0	20	30	219	0	1	0	0	2	0	2020-08-25	2020-08-25	5.5	0	4	6.3	0	1	0	1	1	0	0	2	0	0	85	9.7	0.98	6	5	514	313	201	173	152	123	78	514	514	1813	379
2	0	53	164.5	62.5	23.0966	0	0	0	39	39	201	0	1	0	0	2	0	2021-01-26	2021-01-26	5.98	0	2	5.6	0	1	1	1	0	0	0	2	0	0	101	109	1.05	15	8	1491	1123	785	566	391	249	148	1491	1491	3506	4639
1	0	54	165	55	20.202	0	0	0	50	42	268	0	0	1	0	2	0	2021-06-22	2021-06-22	7.15	0	3	4.5	0	1	1	1	0	1	0	2	0	0	61	19.4	1.02	7	6	847	261	183	138	70	45	34	847	847	1075	238
3	0	56	177	73	23.3011	0	0	0	69	198	203	0	0	0	0	2	0	2021-03-30	2021-03-30	7.53	0	4	5	1	1	0	0	0	0	0	2	0	0	86	214.7	1.3	19	7	228	122	87	65	46	60	24	228	228	684	139
2	0	54	172	70	23.6614	0	0	1	39	45	230	0	0	0	0	2	0	2021-04-22	2021-04-22	7.78	0	4	3.3	0	1	0	1	1	1	1	2	0	0	74	30.8	1.24	11	6	271	181	128	98	66	54	36	271	271	497	135
2	0	46	165	70.5	25.8953	0	0	0	19	40	170	0	1	0	0	2	0	2021-07-14	2021-05-28	8.09	0	2	5	0	1	0	1	0	0	0	2	0	0	55	70.6	1.32	15	11	752	638	429	352	244	208	175	752	752	1164	306
1	0	56	170	51	17.6471	0	0	0	16	43	238	0	0	0	0	2	0	2020-11-09	2020-11-09	8.1	0	2	11.2	1	1	0	0	1	0	0	2	0	0	76	40	1.26	12	8	912	580	337	203	130	83	51	912	912	1122	222
2	0	57	172	76	25.6896	1	0	0	25	56	248	0	1	0	0	2	0	2021-06-09	2021-06-09	8.84	0	1	3.5	0	1	1	1	0	0	0	2	0	0	1.01	60.6	1.73	30	11	779	545	337	241	172	114	128	779	779	2915	699
3	0	49	164	57	21.1927	0	0	1	41	64	181	0	0	0	0	2	0	2021-06-21	2021-01-27	10.09	0	2	5	0	1	0	1	0	0	0	2	0	0	53	21.1	1.41	11	7	525	344	393	293	199	160	110	525	525	791	310
3	0	49	170	68	23.5294	0	0	0	134	133	386	0	0	0	0	2	1	2018-12-04	2018-12-04	10.57	0	3	15.7	0	1	0	1	0	0	0	2	0	0	105	62.7	1.1	14	7	321	317	227	165	133	92	89	321	321	1060	225
3	0	69	168	72	25.5102	0	0	0	24	34	199	0	0	0	0	2	0	2021-04-22	2021-04-22	10.63	0	2	4.4	0	1	1	1	0	0	0	2	0	0	64	12.1	1.1	7	6	353	235	133	155	131	127	150	353	353	746	256
2	0	58	168	70	24.8016	0	0	0	15	58	192	0	1	0	0	2	0	2021-03-18	2021-03-18	10.82	0	1	5.5	0	1	1	1	0	0	0	2	0	1	71	101.7	1.58	18	9	410	689	429	293	177	106	80	689	689	1317	1076
1	0	67	160	59	23.0469	0	0	0	9	28	218	0	0	0	0	2	0	2021-04-27	2021-04-27	11	0	2	6.1	0	1	0	1	1	0	0	2	0	0	86	112	1.64	19	13	13	101	26	19	19	100	63	101	101	28	286
1	0	60	160	55	21.4844	0	0	0	2332	2596	8536	0	1	0	0	2	0	2021-03-17	2021-03-17	11	0	2	7.2	0	1	0	1	1	0	0	2	0	1	79	58.2	1.09	12	10	2332	6797	6371	3194	1554	835	458	6797	6797	2596	10686
1	0	55	168	72	25.5102	0	0	0	38	62	270	0	0	0	0	2	0	2021-04-02	2021-04-02	11	0	2	3	0	1	1	1	0	1	0	2	0	0	63	33.6	1.25	11	6	440	308	197	142	110	81	68	440	440	1133	335
1	0	52	166	60	21.7738	0	0	1	46	88	235	0	1	0	0	2	0	2021-04-20	2021-04-20	11.56	0	4	4.4	0	1	0	1	0	0	0	2	0	0	70	96.2	1.21	15	8	855	544	391	275	151	116	93	855	855	2217	532
2	0	37	168	100	35.4308	0	0	0	146	401	412	0	1	0	1	2	0	2021-04-07	2021-04-07	11.73	0	4	4.7	0	1	0	1	1	0	0	2	0	0	62	27.4	1.18	10	6	143	169	141	120	131	145	174	174	174	401	163
1	0	70	160	55	21.4844	1	0	0	45	87	192	0	0	0	0	2	0	2021-04-21	2021-04-21	12	0	2	4.8	0	1	1	1	0	0	0	2	0	0	76	177.8	1.33	18	8	538	282	156	98	71	58	44	538	538	1400	244
1	0	57	179	81	25.2801	0	0	0	29	54	211	0	1	0	0	2	0	2021-05-21	2021-02-04	12.47	0	1	5	0	1	1	1	0	0	0	2	0	0	69	33.6	1.38	13	9	647	536	316	122	107	76	63	647	647	2461	689
1	0	56	169	71	24.8591	0	0	0	26	33	211	0	1	0	0	2	0	2021-01-19	2021-01-19	12.97	0	1	6	0	1	1	1	1	0	0	2	0	0	107	46.7	1.24	14	9	698	410	270	201	144	106	85	698	698	2910	841
2	0	33	163	63.5	23.9	0	0	0	20	22	153	0	0	0	0	2	0	2021-07-20	2021-07-20	13.5	0	1	8	0	1	0	1	1	0	0	2	0	0	74	5.8	0.96	6	5	651	478	272	166	106	71	53	651	651	940	355
1	0	64	170	60	20.7612	0	0	0	12	33	164	0	1	0	0	2	0	2021-05-27	2021-05-27	15.17	0	2	3.5	0	1	1	1	0	0	0	2	0	0	82	31.3	1.14	10	6	564	478	345	272	170	71	24	564	564	864	1052
4	0	60	169	63	22.0581	1	0	0	7	35	188	0	1	0	0	2	0	2021-05-18	2021-05-18	16.26	0	1	6	0	1	1	1	0	0	0	2	0	0	62	53.3	1.29	14	8	771	309	214	126	93	81	77	771	771	3179	2951
1	0	40	170	59	20.4152	0	0	1	54	62	185	1	0	0	0	2	0	2020-09-28	2020-09-28	16.94	0	1	2.4	1	1	0	0	1	0	1	2	0	0	59	20.9	1.11	8	6	757	797	635	349	238	150	102	797	797	1239	923
2	0	50	180	50	15.4321	0	0	0	50	123	143	0	0	0	0	2	0	2021-03-29	2021-03-29	17.43	0	4	8	0	1	0	1	1	1	0	2	0	0	38	446.6	1.73	25	10	666	472	266	162	89	58	36	666	666	1358	422
1	0	56	167	61	21.8724	0	0	0	565	935	738	0	0	0	0	2	0	2020-09-04	2020-09-04	18.26	0	4	1.9	0	1	0	1	0	1	1	2	0	0	81	24.4	1.32	11	8	565	487	381	300	250	244	226	565	565	935	317
1	0	51	168	67	23.7387	0	0	0	41	41	238	0	1	0	0	2	0	2021-04-01	2021-04-01	20.05	0	2	4	0	1	1	1	1	1	0	2	0	0	46	29.9	1.42	12	6	292	128	102	90	73	84	104	292	292	979	162
2	0	40	166	60	21.7738	0	0	0	14	40	260	0	1	0	0	2	0	2021-05-07	2021-05-07	20.3	0	4	1	0	1	0	1	0	0	0	2	0	0	62	14.7	1.18	22	11	657	730	515	378	234	163	132	730	730	1611	1583
1	0	44	171	64	21.8871	0	0	0	57	42	245	0	0	0	0	2	0	2020-12-08	2020-12-08	27.2	0	4	3.8	0	1	0	1	1	1	1	1	0	0	89	15.9	0.84	6	5	124	92	78	66	54	58	62	124	124	216	144
2	0	41	172	74	25.0135	1	0	0	40	58	746	0	1	0	0	2	0	2020-11-03	2020-11-03	27.3	0	4	5.6	0	1	0	1	1	1	0	2	0	0	95	24.3	1.3	11	9	496	4474	2809	1352	566	198	103	4474	4474	952	7539
1	0	48	166	55	19.9594	0	0	0	39	66	195	0	1	1	0	2	0	2021-07-14	2021-07-14	29.6	0	4	6	0	1	0	1	0	0	0	2	0	0	61	37.4	1.23	12	8	1572	385	266	215	135	103	75	1572	1572	3660	3252
2	0	48	167	76	27.2509	0	0	0	15	25	159	0	0	0	0	2	0	2021-04-23	2021-04-23	32.79	0	2	6	0	1	0	1	0	1	0	2	0	0	110	18.6	1.29	12	5	129	424	284	185	148	92	63	424	424	422	210
2	0	63	168	53.5	18.9555	0	0	0	101.272	183.668	592.736	0	0	0	0	2	0	2020-08-15	2020-08-15	33	0	4	4	0	1	0	1	1	0	1	2	0	0	69	54.2	1.45	15	11	288	150	93	55	35	26	27	288	288	283	115
2	0	54	163	64	24.0882	0	0	0	42	68	177	0	1	1	0	2	0	2021-04-02	2021-04-02	34.97	0	2	7	1	1	0	0	0	0	0	2	0	0	68	30.1	1.23	11	6	1462	626	393	221	132	94	77	1462	1462	4859	6929
3	0	51	175	80	26.1224	0	0	0	25	36	117	0	0	0	0	2	1	2017-04-05	2017-04-05	37.44	0	2	4	1	1	0	0	1	0	0	2	0	1	94	20.5	1.04	8	6	425	2899	1319	479	212	80	30	2899	2899	1607	504
2	0	54	170	70	24.2215	0	0	0	346	561	839	0	0	0	1	2	0	2020-12-31	2020-12-31	38.65	0	4	3.5	1	1	0	0	1	0	0	2	0	1	90	40	1.55	15	6	459	279	9	134	114	107	73	459	459	569	167
2	0	58	175	55	17.9592	0	0	0	22	31	121	0	0	0	0	2	0	2020-10-19	2020-10-19	41.77	0	4	0.8	0	1	0	1	1	0	0	2	0	0	82	16.1	1.03	7	6	342	313	273	177	108	70	49	342	342	1298	583
1	0	63	170	70	24.2215	0	0	1	21	70	288	0	1	0	0	2	0	2021-08-11	2021-08-11	42.31	0	3	4	0	1	1	1	0	0	0	2	0	0	59	34.2	1.17	11	7	3037	791	480	390	288	210	142	3037	3037	8820	4626
3	0	62	170	65	22.4913	0	0	1	21	22	191	0	0	1	0	2	0	2021-04-08	2021-04-08	50	0	2	4	0	1	1	1	0	1	0	2	0	0	64	10.7	1.03	7	5	221	138	90	144	171	95	59	221	221	619	150
3	0	52	160	68	26.5625	0	0	0	86	106	326	0	0	0	0	2	1	2017-11-20	2017-11-20	53.71	0	1	5	1	1	0	0	1	0	0	2	0	1	50	28.5	1.37	12	7	1520	413	202	129	104	82	118	1520	1520	1692	515
1	0	46	170	77.5	26.8166	0	0	0	41	45	116	0	1	0	0	2	0	2021-08-24	2021-08-24	55.14	0	2	6	0	1	0	1	1	0	0	2	0	0	69	26.9	1.14	10	8	1190	255	523	248	200	123	251	1190	1190	3189	1198
3	0	65	172	70	23.6614	0	0	0	11	34	156	0	1	0	0	2	1	2017-03-14	2021-01-22	81.09	0	4	7	0	1	0	1	1	0	0	2	0	0	380	260	3.18	40	10	635	4091	3345	1509	630	230	89	4091	4091	3455	1028
2	0	57	162	60	22.8624	0	0	0	443	809	1897	0	1	0	0	2	0	2021-03-05	2021-03-05	90.11	0	2	3.7	0	1	1	1	0	0	0	2	0	0	62	14.4	1.25	9	6	443	278	202	161	226	240	207	443	443	809	370
1	0	50	173	70	23.3887	0	0	1	2801	3744	7707	0	0	0	0	2	0	2021-04-07	2021-04-07	94.33	0	4	5.7	0	1	0	1	0	0	0	2	0	0	52	16.1	1.12	8	7	264	425	341	360	232	159	125	425	425	677	674
4	0	31	160	60	23.4375	0	0	0	1281	2219	6740	0	1	0	0	2	0	2020-11-19	2020-11-19	99.14	0	4	3.1	1	1	0	0	0	0	1	2	0	0	71	8.4	1.03	7	5	941	751	640	433	269	218	200	941	941	2343	821
3	0	56	165	60	22.0386	0	0	0	22	38	179	0	1	0	0	2	0	2021-03-29	2021-03-29	117.24	0	4	2	0	1	0	1	0	0	0	2	0	0	63	28.4	1.27	11	7	3660	625	391	244	161	96	63	3660	3660	14426	2106
3	0	59	172	80	27.0416	0	0	0	42	41	169	0	1	0	0	2	0	2020-12-19	2020-12-19	119.06	0	4	12	0	1	0	1	0	0	0	2	0	0	86	26.9	1.19	10	7	1159	488	340	225	158	97	66	1159	1159	3094	1943
1	0	61	160	66	25.7812	1	0	0	21	26	152	0	0	0	0	2	0	2020-12-29	2020-12-29	132.35	0	2	3.3	0	1	1	1	0	0	0	2	0	0	75	44	1.14	11	7	462	340	284	283	224	159	122	462	462	576	214
3	0	49	168	75	26.5731	1	0	0	101.272	183.668	592.736	0	1	0	0	2	1	2018-07-20	2018-07-20	132.89	0	1	5.7	1	1	0	0	0	0	0	2	0	0	58	23.3	1.23	10	6	4409	3105	1001	246	91	42	20	4409	4409	19325	17434
3	0	61	165	63	23.1405	0	0	0	321	199	261	0	0	0	0	2	0	2021-04-09	2021-04-09	141.59	0	4	5.7	0	1	0	1	1	1	1	2	0	0	80	25.4	0.87	8	5	405	199	157	104	94	71	148	405	405	657	274
1	0	55	168	54	19.1327	0	0	0	1708	5573	16904	0	0	0	0	2	0	2021-04-20	2021-04-20	162.95	0	4	6.9	1	1	0	0	0	0	0	2	0	1	146	378.4	2.21	32	9	1708	1081	648	489	304	206	151	1708	1708	5573	4607
2	0	45	170	80	27.6817	0	0	0	40	90	190	0	1	0	0	2	0	2020-12-29	2020-12-28	185.55	0	4	12	0	1	0	1	1	0	0	2	0	0	68	27.9	1.34	12	7	602	1156	716	494	289	177	104	1156	1156	2282	840
1	0	62	171	64.5	22.0581	0	0	0	18	30	233	0	0	0	0	2	0	2020-12-23	2020-12-23	197.27	0	4	2	0	1	0	1	0	0	0	2	0	0	46	30.3	1.07	9	5	557	337	215	174	144	99	66	557	557	1325	332
1	1	58	154	54	22.7694	0	0	0	15	25	222	0	0	0	0	2	0	2021-01-27	2021-01-27	1.28	0	1	10	1	1	0	0	0	0	0	2	0	0	162	382.4	2.47	34	10	215	126	80	55	44	31	22	215	215	683	148
3	1	54	160	48	18.75	0	0	0	82	125	181	0	0	0	0	2	0	2020-12-26	2020-12-26	1.85	0	#NULL!	0	0	1	0	1	0	0	0	2	0	0	57	93.3	1.33	16	9	625	791	480	390	288	210	142	791	791	1216	702
1	1	58	165	55	20.202	1	0	1	50	59	196	0	0	0	0	2	1	2019-12-02	2019-12-02	5.25	0	4	3	0	1	0	1	1	1	0	2	0	0	56	29	1.03	9	6	541	1199	681	458	264	156	87	1199	1199	1039	194
3	1	38	151	49	21.4903	0	0	0	239	345	757	0	0	0	0	2	1	2020-01-28	2020-01-28	6	0	4	1.7	0	1	0	1	0	1	0	2	0	0	44	21.6	1.07	8	8	239	217	127	88	86	71	55	239	239	345	223
1	1	53	167	65	23.3067	0	0	0	29	43	230	0	0	0	0	2	0	2020-12-23	2020-12-23	6.24	0	5	1.5	0	1	0	1	0	0	0	2	0	1	63	44.2	1.33	13	7	224	779	533	360	228	166	151	779	779	340	332
1	1	60	173	66	22.0522	0	0	0	27	45	117	0	1	0	0	2	1	2021-01-22	2021-01-22	8.23	0	4	10	0	1	0	1	1	0	0	2	0	0	81	18.8	1.17	9	6	1154	284	205	144	107	74	58	1154	1154	3318	1348
3	1	54	169	61	21.3578	0	0	0	44	55	244	0	0	0	0	2	0	2021-08-06	2021-08-06	9.46	0	1	3	1	1	0	0	0	1	0	2	0	0	52	43.3	1.35	13	8	510	#NULL!	#NULL!	#NULL!	#NULL!	#NULL!	#NULL!	#NULL!	957.08	867	301
3	1	50	166	65	23.5883	0	0	0	25	41	202	0	1	0	0	2	0	2015-05-19	2021-07-14	39.79	0	2	3.5	0	1	1	1	0	0	0	2	0	0	186	86.6	3.42	33	10	2654	#NULL!	#NULL!	#NULL!	#NULL!	#NULL!	#NULL!	#NULL!	957.08	5341	1693
3	1	45	180	70	21.6049	0	0	0	44	60	263	0	0	0	0	2	0	2021-07-05	2021-07-05	58.43	0	2	4	0	1	1	1	0	1	0	2	0	0	78	32	1.86	30	13	254	144	92	69	38	21	14	254	254	527	142
3	1	57	170	68	23.5294	0	0	0	106	232	353	0	0	0	0	2	0	2021-05-20	2021-05-20	90.87	0	#NULL!	0	0	1	0	1	0	0	0	2	0	0	75	37.1	1.39	13	10	886	63	67	68	60	106	96	886	886	1293	256
2	0	59	168	55	19.487	0	0	0	26	69	248	0	0	0	0	2	0	2020-11-19	2020-12-13	2	0	2	0.8	0	1	1	1	0	0	0	2	0	1	69	52	1.05	11	12	351	193	152	259	266	251	199	351	351	772	193
2	0	62	170	67.5	23.3564	0	0	0	52	62	243	0	0	0	0	2	1	2017-12-01	2020-03-15	2.34	0	1	15	0	1	0	1	0	0	0	2	0	1	114	14.2	1.01	9	6	162	148	107	75	52	36	29	162	162	659	399
3	0	68	167	65	23.3067	0	0	0	108	86	214	0	1	0	0	2	1	2018-09-13	2019-07-12	2.46	0	1	9.6	0	1	0	1	0	0	0	2	0	0	68	6.6	1.06	7	6	1995	1085	735	451	295	230	190	1995	1995	3886	705
2	0	51	170	66	22.8374	0	0	0	411	731	1436	0	1	0	0	2	0	2019-08-01	2020-11-26	2.88	0	1	7	0	1	0	1	0	0	0	2	0	1	186	438	1.47	30	9	411	289	182	123	89	76	89	411	411	731	269
2	0	54	178	69	21.7776	1	0	0	21	42	2093	0	1	0	0	2	1	2021-01-22	2021-01-22	1.25	0	4	15	0	1	0	1	0	1	1	3	1	1	62	18.6	1.1	8	7	3058	452	382	246	159	97	64	3058	3058	7365	2496
1	0	58	170	60	20.7612	0	0	0	31	26	152	0	1	0	0	2	0	2021-03-02	2021-03-02	1.84	0	4	2.4	0	1	0	0	1	1	1	3	1	0	70	11.4	1.59	12	7	346	207	157	147	105	98	84	346	346	2372	478
1	0	42	162	52	19.8141	0	0	0	138	136	269	0	0	0	0	2	0	2021-04-14	2021-04-14	1.91	0	4	1	0	1	0	0	1	0	1	3	1	0	70	63.9	0.94	11	7	507	688	397	272	186	134	95	688	688	862	718
1	0	61	160	60	23.4375	0	0	0	16	37	158	0	0	0	0	2	0	2021-04-30	2021-04-30	2.38	0	1	5.5	0	1	1	1	0	0	0	2	1	1	122	25.9	1.38	15	8	76	41	26	20	18	24	38	76	76	295	88
1	0	49	155	48	19.9792	0	0	0	27	151	240	0	0	0	0	2	0	2021-05-28	2021-08-06	2.66	0	2	9.7	0	1	0	1	0	0	0	3	1	0	187	16.8	11.5	40	7	839	527	312	230	165	113	86	839	839	2210	1158
1	0	64	178	52	16.4121	0	0	0	101.272	183.668	592.736	0	0	0	0	2	0	2021-07-13	2021-07-13	3.28	0	4	3.5	0	1	0	1	1	0	0	3	1	0	66	10.1	1.01	7	7	593	81	61	54	36	27	21	593	593	807	713
1	0	44	165	70	25.7117	1	0	0	26	65	212	1	1	0	0	2	0	2021-03-01	2021-03-01	3.58	0	4	4.8	0	1	0	0	1	1	1	3	1	0	49	33.2	1.46	13	8	26	333	236	171	124	90	83	333	333	65	443
3	0	67	169	72.4	25.3493	0	0	1	11	29	252	1	1	0	0	2	0	2021-07-08	2021-07-08	3.6	0	1	3.3	0	1	1	1	1	0	1	3	1	0	54	18.5	0.88	7	6	993	663	474	276	189	123	75	993	993	3957	1407
1	0	51	174	67.9	22.427	0	0	1	83	64	214	0	0	0	0	2	0	2021-04-29	2021-04-29	3.87	0	3	8	0	1	0	0	1	0	0	3	1	0	47	12	1.13	8	6	195	128	86	69	57	62	77	195	195	676	145
1	0	64	165	54	19.8347	0	0	0	10	26	200	0	0	0	0	2	0	2020-12-07	2020-12-07	4.13	0	2	3.1	0	1	1	1	0	0	0	3	1	0	170	40.8	1.73	22	11	48	40	28	28	25	23	22	48	48	214	87
3	0	59	160	66	25.7812	1	0	0	118	62	247	0	1	0	0	2	0	2020-12-14	2020-12-14	4.26	0	1	6	0	1	1	1	1	0	0	3	1	0	60	18.2	0.92	7	5	1298	#NULL!	#NULL!	#NULL!	#NULL!	#NULL!	#NULL!	#NULL!	957.08	3913	1194
1	0	60	165	60	22.0386	1	1	1	208	608	1708	0	0	0	0	2	0	2021-03-13	2021-03-13	5	0	2	6.5	0	1	0	0	0	1	0	3	1	0	146	51.4	1.41	19	9	208	157	96	65	42	28	14	208	208	608	357
1	0	65	165	54	19.8347	0	0	0	29	39	178	0	0	0	0	2	0	2021-07-19	2021-07-19	5.63	0	2	3.5	0	1	1	1	1	0	0	3	1	0	139	44.9	1.51	14	11	1046	2183	1024	519	366	156	84	2183	2183	2569	4350
2	0	72	170	63	21.7993	0	0	0	37	27	142	0	0	0	0	2	0	2020-12-07	2020-12-07	7.73	0	1	6.3	0	1	1	1	0	0	0	3	1	1	79	37.5	1.01	10	6	114	146	107	73	74	47	36	146	146	193	136
3	0	45	168	74	26.2188	0	0	0	818	1075	2975	0	0	0	0	2	0	2021-03-08	2021-03-08	12	0	2	3.6	0	1	1	1	0	0	0	3	1	1	162	462.2	2.14	33	9	818	561	403	308	309	245	196	818	818	1075	749
1	0	47	168	61	21.6128	0	0	1	9	20	455	0	0	0	0	2	0	2021-01-28	2021-01-28	13.86	0	2	9	1	1	0	0	0	0	0	3	1	1	76	12.6	1.05	14.5666	#NULL!	1163	965	1090	700	556	393	302	1163	1163	2119	793
3	0	41	170	68	23.5294	0	0	0	32	37	174	0	0	0	0	2	0	2020-11-17	2020-11-17	14.01	0	2	9	0	1	0	0	1	0	0	3	1	0	82	11.9	1.06	7	6	475	398	247	211	143	112	92	475	475	675	284
2	0	61	151	59	25.8761	0	1	1	56	108	284	0	1	1	0	2	1	2018-03-19	2018-03-19	15.46	0	4	5.6	0	1	0	1	0	1	1	3	1	0	58	11.4	1.04	7	5	130	#NULL!	#NULL!	#NULL!	#NULL!	#NULL!	#NULL!	#NULL!	957.08	209	363
3	0	58	160	47	18.3594	0	0	0	42	54	153	0	0	0	0	2	1	2021-03-01	2021-03-01	17.25	0	1	7	0	1	1	1	0	0	0	3	1	0	53	75	1.19	14	10	41	703	582	365	237	143	83	703	703	61	1136
2	0	62	174	70	23.1206	0	0	0	54	105	299	0	1	0	0	2	0	2020-10-20	2020-10-20	22.95	0	1	7	0	1	0	0	0	0	0	2	1	1	78	16.4	1.18	8	5	760	576	392	242	182	131	85	760	760	7531	1198
3	0	45	170	70	24.2215	0	0	0	184	40	272	0	1	0	0	2	0	2021-05-10	2021-05-10	39.02	0	3	6	0	1	0	1	0	1	0	3	1	0	67	17.7	1.18	8	5	2342	1814	1053	605	375	268	182	2342	2342	6109	3181
1	0	64	163	66	24.841	1	0	0	43	98	268	0	1	0	0	2	1	2019-04-17	2019-04-17	41.62	0	4	6	1	1	0	0	0	1	0	3	1	0	83	238.6	1.27	19	9	956	2362	1353	771	455	289	186	2362	2362	1472	1719
1	0	59	160	48	18.75	0	0	0	22	32	204	0	0	0	0	2	0	2021-09-26	2020-11-23	84.61	0	1	8	0	1	0	1	0	0	1	3	1	0	77	23.3	1.19	10	6	386	272	205	140	110	0	87	386	386	449	158
2	0	55	180	74	22.8395	0	0	0	19	22	217	0	0	0	0	2	0	2020-11-23	2020-11-23	84.61	0	1	8	1	1	0	0	0	0	0	3	1	0	91	12	0.98	7	5	388	1308	#NULL!	#NULL!	#NULL!	#NULL!	#NULL!	1308	1308	382	157
2	0	49	170	71	24.5675	0	0	0	118	139	228	0	0	0	0	2	0	2021-03-03	2021-03-03	100.17	0	3	17.8	1	1	0	0	0	1	1	3	1	1	78	71.3	1.53	17	8	622	448	248	116	79	59	36	622	622	700	390
3	0	51	168	69	24.4473	1	0	0	13	43	208	0	1	0	0	2	0	2021-01-19	2021-01-19	137.12	0	4	3	0	1	0	0	1	0	0	3	1	0	86	17.7	1.11	8	6	67	57	58	58	38	32	31	67	67	167	76
3	1	57	178	77	24.3025	1	0	0	27	38	541	0	0	0	0	2	0	2021-04-27	2021-04-27	1.5	0	1	15.2	0	1	0	0	0	0	0	3	1	1	72	9.1	2.56	17	5	1207	1544	990	613	441	286	190	1544	1544	1053	587
4	1	71	177	63	20.1092	1	0	1	46	33	102	0	0	0	0	2	0	2021-07-13	2021-07-13	184.25	0	#NULL!	4	0	1	0	1	0	0	0	3	1	0	97	51.8	1.64	11	12	1088	673	423	229	138	85	51	1088	1088	2020	1163
2	0	51	162	54.5	20.7667	0	0	0	74	115	1223	0	0	0	0	1	0	2020-06-11	2021-03-04	467.1	1	4	3.8	0	1	0	1	1	1	1	2	0	0	59	9	0.91	6	7	195	292	191	118	103	77	66	292	292	682	740
2	0	38	165	67	24.6097	0	0	0	32	15	275	0	0	0	0	1	1	2018-01-22	2018-12-05	581.1	1	4	14.5	1	1	0	0	0	0	0	2	0	1	52	42.9	1.21	12	7	511	194	208	146	83	69	61	511	511	818	177
2	0	51	168	70	24.8016	0	0	0	101.272	183.668	592.736	0	0	0	0	1	1	2020-02-05	2020-02-05	671.62	1	5	3	0	1	0	1	0	0	0	2	0	0	67	119.3	1.15	15	10	1312	924	422	181	73	33	20	1312	1312	1370	748
1	0	45	166	67	24.3141	0	0	0	22	39	291	0	0	0	0	1	0	2020-09-12	2021-04-16	679.13	1	4	8.1	0	1	0	0	1	0	0	2	0	0	148	468	2.11	32	9	587	359	236	188	171	148	104	587	587	1143	705
2	0	48	172	64	21.6333	0	0	0	83	96	185	0	1	0	0	1	0	2021-04-30	2021-04-30	772.66	1	4	6	0	1	0	1	1	1	1	2	0	1	52	14.6	1.02	7	5	496	325	234	190	139	93	59	496	496	2597	1153
1	0	59	168	79	27.9904	0	0	0	22	41	209	0	0	0	0	1	0	2019-05-01	2020-09-18	1388.32	1	4	4.8	1	1	0	0	1	1	0	2	0	0	55	11.8	1.02	7	5	852	342	212	98	47	30	13	852	852	1502	416
1	0	52	160	85	33.2031	0	0	0	35	33	291	0	0	0	0	1	1	2018-01-02	2018-07-03	1959.02	1	3	3	0	1	0	0	0	0	1	2	0	0	76	16.1	1.11	8	5	741	1087	696	464	266	157	102	1087	1087	649	539
3	0	52	175	58	18.9388	0	0	0	24	44	235	0	1	0	0	1	1	2016-02-10	2016-04-05	2614.33	1	3	4	0	1	0	0	1	0	0	2	0	1	341	125.7	3.21	40	6	632	#NULL!	#NULL!	#NULL!	#NULL!	#NULL!	#NULL!	#NULL!	957.08	818	307
2	0	65	170	70	24.2215	0	0	0	30	47	286	0	0	0	0	1	1	2019-01-15	2019-09-06	3452.29	1	1	16	1	1	0	0	0	0	0	2	0	0	77	11.4	1.11	8	6	293	204	148	103	61	38	24	293	293	648	196
3	0	30	162	70	26.6728	0	0	0	38	44	151	0	0	0	0	1	0	2018-09-20	2020-12-21	4400.69	1	3	9	0	1	0	0	0	0	1	2	0	0	82	18	1.14	8	5	493	966	747	519	329	230	89	966	966	1130	1632
2	0	58	171	61	20.8611	0	0	0	26	27	146	0	0	0	0	1	0	2020-07-23	2020-08-03	6533.92	1	4	5.4	0	1	0	1	0	1	0	2	0	1	71	11.8	1.08	7	6	222	181	130	150	135	107	73	222	222	504	193
4	0	30	161	47	18.132	0	0	0	54	500	1891	0	0	0	0	1	1	2017-12-07	2018-08-10	7575.19	1	1	14.6	0	1	0	0	0	0	0	2	0	1	78	114.2	1.42	18	9	772	448	272	179	120	100	84	772	772	1420	378
2	0	36	183	65	19.4094	0	0	0	19	21	276	0	1	0	0	1	1	2017-07-03	2019-02-09	8367	1	4	12	0	1	0	0	0	1	0	2	0	0	63	18	1.16	8	6	1400	778	283	174	171	127	79	1400	1400	2890	709
3	0	50	170	70	24.2215	0	0	0	384	1660	4479	0	0	0	0	1	1	2019-07-30	2019-12-14	8884.08	1	1	11.9	0	1	0	0	1	0	0	2	0	0	163	462.2	2.21	34	9	1660	123	103	67	47	41	34	1660	1660	1660	483
4	0	48	169	74.5	26.0845	0	0	0	26	224	425	0	0	0	0	1	1	2019-01-10	2019-01-10	20879.4	1	4	19.05	1	1	0	0	0	0	0	2	0	1	81	71	1.2	14	10	322	7585	6232	4114	2273	904	498	7585	7585	221	91
2	0	59	179	81	25.2801	0	0	0	85	96	439	0	0	0	0	1	1	2016-02-26	2017-02-18	22094.1	1	4	10	0	1	0	1	0	0	0	2	0	0	804	428	3.79	40	8	803	324	185	100	57	38	28	803	803	2261	663
3	0	64	170	68	23.5294	0	0	0	29	86	341	0	0	0	0	1	1	2017-11-10	2018-10-20	22647.5	1	1	7	0	1	0	0	0	0	0	2	0	0	69	77.3	1.21	14	10	103	76	56	46	41	29	18	103	103	215	96
2	0	36	170	55	19.0311	0	0	0	89	215	247	0	1	1	0	1	0	2018-06-21	2020-12-15	58556.1	1	4	8	0	1	0	0	0	1	1	2	0	0	49	583.7	1.24	22	8	1067	#NULL!	#NULL!	#NULL!	#NULL!	#NULL!	#NULL!	1067	1067	1959	1125
3	0	34	173	70	23.3887	0	0	0	19	33	332	0	0	0	0	1	0	2018-08-01	2020-06-24	320911	1	4	8.2	1	1	0	0	0	1	1	2	0	0	66	8.2	0.98	6	6	859	498	282	312	227	180	159	859	859	894	156
3	1	48	158	51	20.4294	1	0	0	24	108	217	0	0	0	0	1	0	2021-08-12	2021-04-13	207.69	1	4	4.6	0	1	0	1	1	1	0	2	0	0	40	60.2	1.21	13	10	200	149	107	68	47	31	24	200	200	308	94
1	1	54	174	74	24.4418	1	0	0	45	54	388	0	0	0	0	1	1	2016-06-13	2017-12-16	456.04	1	3	10	1	1	0	1	1	0	0	2	0	1	50	102.6	13.2	40	7	844	265	170	115	87	60	38	844	844	3639	604
3	1	68	158	67.5	27.0389	0	0	1	11	127	374	0	0	0	0	1	0	2017-12-05	2021-01-12	1120.96	1	2	6	1	1	0	0	0	0	0	2	0	0	60	182	1.88	22	10	1110	393	250	174	131	87	69	1110	1110	1899	429
3	1	33	170	68	23.5294	0	0	0	108	186	359	0	0	0	0	1	1	2018-08-06	2018-11-01	4934.26	1	2	2	1	1	0	0	0	0	0	2	0	1	74	74.6	1.19	14	7	427	432	360	278	221	164	109	432	432	3314	2871
3	1	48	157	64	25.9645	0	0	0	64	332	233	0	1	0	0	1	1	2018-09-14	2019-02-04	258487	1	4	5	0	1	0	0	0	0	0	2	0	0	40	36.5	1.05	10	7	678	723	392	236	157	103	80	723	723	2674	3564
2	1	52	160	55	21.4844	0	0	0	861	3251	6137	0	0	0	0	1	1	2017-03-23	2017-04-21	1368000	1	1	14	1	1	0	0	1	0	0	2	0	1	59	30	1.07	14.5666	#NULL!	1030	1937	1314	823	540	433	340	1937	1937	4995	3629
3	0	55	167	69	24.7409	0	0	0	43	50	148	0	0	0	0	1	1	2017-11-03	2017-11-03	59026.6	1	4	10	0	1	0	0	0	0	0	2	1	1	97	16.1	1.35	11	5	249	715	477	355	299	249	469	715	715	492	373
1	0	36	168	66.8	23.6678	0	0	0	101.272	183.668	592.736	0	1	0	0	1	1	2019-10-19	2019-10-19	80000	1	1	10.6	0	1	0	0	0	0	0	3	1	0	74	16.2	1.07	7	7	882	242	212	142	107	80	62	882	882	2402	2499
1	0	53	172	60	20.2812	0	0	1	101.272	183.668	592.736	0	1	0	0	1	1	2019-02-28	2019-02-28	322736	1	3	6.5	0	1	0	0	0	0	0	3	1	1	147	596.7	1.79	31	9	2252	541	342	249	194	119	81	2252	2252	10237	7290
1	0	49	168	69	24.4473	0	0	1	57	83	314	0	1	0	0	1	1	2017-06-03	2017-06-03	1007800	1	4	13	1	1	0	0	0	0	0	3	1	1	100	22.2	1.09	10	7	1441	#NULL!	#NULL!	#NULL!	#NULL!	#NULL!	#NULL!	#NULL!	957.08	3737	802
3	0	46	176	60	19.3698	0	0	0	1365	3781	9041	0	1	0	0	1	1	2020-03-24	2020-03-24	437.23	1	4	3.4	0	1	0	0	1	1	0	3	1	1	59	19.3	1.25	9	8	1729	690	445	300	185	125	83	1729	1729	3388	164
3	0	46	165	72	26.4463	0	0	0	97	439	1273	0	0	0	0	1	0	2020-06-15	2021-04-12	467.49	1	1	18.5	1	1	0	0	0	0	0	3	1	1	105	30.9	1.22	13	6	121	49	36	29	24	21	17	121	121	621	254
2	0	63	169	72	25.2092	0	0	0	32	42	204	0	1	1	1	1	1	2020-09-20	2020-11-15	541.42	1	4	9.3	1	1	0	0	0	0	0	2	1	1	85	21.2	1.11	8	8	1481	704	306	150	83	48	27	1481	1481	4010	502
2	0	63	160	65	25.3906	0	0	1	38	138	156	0	1	0	0	1	1	2019-12-23	2019-12-23	647.35	1	4	4.5	1	1	0	0	0	0	1	3	1	1	90	46.8	1.21	13	8	1251	109	60	34	30	23	22	1251	1251	2912	366
2	0	43	170	70	24.2215	0	0	0	27	62	307	0	0	0	0	1	0	2019-07-01	2021-03-09	753.12	1	4	6	1	1	0	0	0	0	0	3	1	1	182	360	1.58	30	10	729	700	535	374	232	165	107	729	729	1805	2301
1	0	47	170	65	22.4913	0	0	0	49	34	449	0	0	0	0	1	1	2020-01-01	2020-01-01	970.24	1	4	9.1	1	1	0	0	1	0	0	4	1	0	162	362.4	2.11	32	9	531	227	155	116	105	70	52	531	531	1587	231
2	0	67	170	68	23.5294	0	0	0	35	27	188	0	1	0	0	1	1	2018-06-21	2019-01-19	980.72	1	4	4	0	1	0	0	1	0	0	3	1	1	69	13.9	0.95	6	5	1839	5086	2568	1509	#NULL!	#NULL!	#NULL!	5086	5086	2076	1269
3	0	41	168	60.5	21.4357	0	0	0	245	129	353	0	0	0	0	1	0	2020-12-20	2021-03-03	1039.73	1	1	17.9	1	1	0	0	0	0	0	3	1	1	60	16.8	1.11	8	6	520	506	370	309	273	247	186	520	520	1514	415
2	0	59	169	66	23.1084	0	0	0	45	28	215	0	0	0	0	1	1	2016-05-02	2016-05-02	1137.6	1	4	2.9	0	1	0	1	1	0	0	3	1	0	296	18	1.04	20	7	933	497	342	223	143	86	60	933	933	1329	387
3	0	42	170	68	23.5294	0	0	1	34	50	288	0	1	0	0	1	1	2017-11-20	2020-01-14	1573.16	1	4	10	0	1	0	0	0	0	0	3	1	1	72	14.8	0.99	6	5	1478	1293	867	542	327	246	0	1478	1478	4545	5319
3	0	60	168	77	27.2817	0	0	0	4	34	186	0	1	0	0	1	1	2016-05-20	2016-09-12	1875.12	1	2	6.2	0	1	0	0	0	0	0	2	1	0	168	146.3	3.38	34	11	823	1128	932	481	234	127	107	1128	1128	2398	420
2	0	47	160	55	21.4844	0	0	0	36	79	446	0	0	1	0	1	1	2019-03-01	2019-12-23	2662.05	1	2	7	0	1	0	0	0	0	0	3	1	1	81	20.2	1.02	7	7	496	436	425	382	270	202	139	496	496	1044	1086
3	0	58	168	50	17.7154	1	0	0	40	71	206	0	1	0	0	1	1	2017-05-11	2018-01-03	4154.61	1	1	13	1	1	0	0	1	1	0	3	1	1	86	15.5	1.05	7	5	1308	#NULL!	#NULL!	#NULL!	#NULL!	#NULL!	#NULL!	#NULL!	957.08	2069	449
1	0	39	170	75	25.9516	0	0	0	53	32	190	0	1	0	0	1	1	2017-03-13	2020-06-08	7128.39	1	2	3.2	0	1	1	1	1	0	0	3	1	0	108	127.6	3.06	28	10	1284	#NULL!	#NULL!	#NULL!	#NULL!	#NULL!	#NULL!	#NULL!	957.08	2641	1857
1	0	40	169	63.5	22.2331	0	0	0	27	46	260	0	0	0	0	1	1	2017-11-24	2019-07-02	8315.89	1	4	15.8	0	1	0	0	0	0	0	3	1	1	64	24.2	1.31	11	5	295	182	118	115	146	146	114	295	295	555	163
1	0	40	170	64.5	22.3183	0	0	0	101.272	183.668	592.736	0	0	0	0	1	1	2016-10-06	2019-01-16	12713.1	1	1	14	1	1	0	0	1	1	0	3	1	1	65	136.4	1.32	17	7	1156	70	70	46	30	21	16	1156	1156	2210	582
2	0	44	171	65	22.2291	0	0	0	26	44	239	0	0	0	0	1	1	2019-04-01	2019-07-17	13821.3	1	4	11.4	1	1	0	0	0	0	0	3	1	1	162	566.4	2.47	36	9	445	271	189	129	95	92	77	445	445	1148	360
1	0	35	170	70	24.2215	0	0	0	30	45	262	0	0	0	0	1	1	2019-06-01	2020-02-20	20934.6	1	1	6.5	1	1	0	0	0	0	0	3	1	1	69	35.2	1.12	10	5	90	69	62	53	48	44	33	90	90	446	147
3	0	60	170	69	23.8754	0	0	0	62	92	335	0	0	0	0	1	1	2017-06-09	2020-02-01	22094.1	1	1	7	0	1	0	1	0	0	0	2	1	0	71	29	1.19	10	6	114	3151	3624	1847	1000	539	312	3624	3624	270	99
4	0	50	167	78	27.968	0	0	0	31	215	422	0	1	0	0	1	1	2018-07-18	2018-11-13	22094.1	1	4	2	0	1	0	0	0	0	0	3	1	0	55	56.3	1.27	14	10	254	903	#NULL!	#NULL!	#NULL!	#NULL!	#NULL!	903	903	382	100
1	0	59	167	47	16.8525	0	0	0	22	103	255	0	1	0	0	1	1	2017-04-21	2018-02-02	39191.9	1	4	0	1	1	0	0	0	0	0	3	1	1	60	144	1.32	18	8	478	1886	1063	700	417	234	154	1886	1886	894	314
2	0	61	165	61	22.4059	0	0	1	39	153	271	0	1	0	0	1	1	2019-11-01	2019-11-28	79667.6	1	4	11.8	1	1	0	0	0	0	1	3	1	1	186	382	1.47	30	10	2014	1439	730	494	290	187	117	2014	2014	3271	2017
2	0	32	169	58	20.3074	0	0	0	39	70	270	0	1	0	0	1	1	2018-01-30	2019-05-22	135448	1	4	13.3	1	1	0	0	0	0	0	2	1	1	60	37	1.21	11	7	1669	787	461	274	156	113	79	1669	1669	3334	723
2	0	71	170	70	24.2215	0	0	0	28	75	226	0	0	0	0	1	1	2018-11-28	2019-12-09	248173	1	4	2.4	1	1	0	0	0	1	0	3	1	1	49	27.8	1.24	11	6	158	162	110	77	60	45	33	162	162	901	444
1	0	34	165	60	22.0386	0	0	0	71	260	839	0	1	0	0	1	1	2018-06-01	2019-08-08	1.33985e+06	1	1	17	0	1	0	0	0	1	0	3	1	1	57	330.9	1.48	22	12	340	152	84	57	40	29	27	340	340	687	121
2	1	59	158	66	26.4381	1	0	1	27	45	289	0	0	0	0	1	1	2019-04-06	2019-04-24	349.73	1	3	3.5	0	1	1	1	0	1	0	4	1	0	37	13.6	1.16	14.5666	#NULL!	188	83	82	71	55	38	30	188	188	481	39
2	1	31	172	70	23.6614	0	0	0	20	43	247	0	0	0	0	1	1	2017-01-03	2017-12-20	1117.47	1	4	4	0	1	0	1	1	0	0	3	1	0	70	10.9	1.22	9	10	807	689	486	314	194	137	107	807	807	989	321
4	1	62	150	54	24	0	0	0	24	95	257	0	0	0	0	1	0	2019-05-01	2020-06-01	2180.16	1	4	4.9	0	1	0	0	1	0	0	3	1	1	79	70.2	1.85	19	9	541	338	169	96	69	52	40	541	541	1474	374
3	0	67	172	95	32.112	0	0	1	21	39	190	0	0	0	0	1	1	2020-11-20	2020-12-13	1.3	0	2	7.6	0	1	0	1	0	0	0	2	0	0	68	19	1.15	8	7	834	74	51	36	27	21	#NULL!	834	834	1695	410
1	0	33	175	72	23.5102	0	0	0	407	775	1728	0	0	0	0	1	0	2017-05-09	2021-01-01	1.57	0	4	4.2	0	1	0	1	0	0	0	2	0	1	88	21.5	1.01	7	6	407	220	134	102	88	66	32	407	407	775	241
3	0	45	165	55.5	20.3857	0	0	0	243	859	1953	0	0	0	0	1	1	2018-04-11	2018-12-05	1.86	0	4	8.6	0	1	0	1	0	0	1	2	0	0	47	8.3	1.04	7	5	145	996	959	677	408	269	190	996	996	247	0
3	0	39	173	69	23.0546	0	0	0	32	64	78	0	1	0	0	1	0	2018-06-27	2020-06-16	2.11	0	4	2.7	1	1	0	0	1	1	1	2	0	0	57	21.1	1.18	9	5	1521	1125	665	446	284	184	143	1521	1521	4458	1436
1	0	56	171	59	20.1771	0	0	0	32	21	172	0	0	0	0	1	0	2020-01-02	2021-04-26	2.25	0	3	8.3	0	1	0	1	0	0	0	2	0	0	171	326.4	2.11	32	9	214	292	191	118	103	#NULL!	#NULL!	292	292	1061	362
3	0	48	180	97	29.9383	0	1	0	652	423	5326	0	0	0	0	1	0	2020-11-03	2020-12-21	2.85	0	1	4.1	0	1	1	1	0	0	1	2	0	0	75	22.9	1.05	8	5	888	482	321	215	193	160	119	888	888	3533	574
1	0	45	145	50	23.7812	0	0	0	9	42	323	0	1	1	0	1	1	2016-06-01	2016-12-22	3.01	0	4	13	0	1	0	1	0	0	0	2	0	1	122	202.1	2.68	30	9	1638	203	146	96	66	43	29	1638	1638	3922	1544
3	0	66	158	58	23.2335	0	1	0	56	147	363	0	1	0	0	1	1	2018-09-11	2018-09-18	3.22	0	1	10	1	1	0	0	0	0	0	2	0	1	117	37.6	1.12	13	7	695	2013	2495	1758	599	#NULL!	#NULL!	2495	2495	1261	519
2	0	48	171	97	33.1726	0	0	0	29	48	215	0	1	0	0	1	1	2017-01-06	2021-02-21	4.77	0	2	5	0	1	0	1	0	0	0	2	0	0	49	109	1.79	20	12	285	1049	737	499	288	198	151	1049	1049	1707	2776
1	0	53	170	68	23.5294	0	0	0	58	61	275	0	0	0	0	1	1	2017-12-03	2018-04-30	6.51	0	2	3.5	0	1	1	1	1	1	1	2	0	0	91	18.2	0.99	7	5	517	304	227	186	159	139	108	517	517	1311	290
3	0	43	168	56	19.8413	0	0	0	58	31	179	0	0	0	0	1	1	2017-12-05	2019-10-01	7.15	0	4	1.3	0	1	0	1	1	0	1	2	0	0	76	21.5	0.95	7	5	701	498	262	204	158	139	152	701	701	1908	524
1	0	62	172	66	22.3094	1	0	0	26	129	449	0	0	1	0	1	0	2020-12-22	2021-05-01	7.8	0	4	9.5	0	1	0	1	1	0	0	2	0	0	84	14.6	1.04	7	6	890	587	387	270	214	179	174	890	890	1795	1108
1	0	46	167	60	21.5139	0	0	0	53	64	264	0	1	0	0	1	1	2020-02-29	2020-03-31	7.84	0	4	3.7	0	1	0	1	0	0	0	2	0	0	72	16	0.86	6	5	4852	1847	1552	1036	745	640	463	4852	4852	2539	2573
3	0	43	168	84	29.7619	0	0	0	234	373	1385	0	1	0	1	1	0	2020-05-30	2020-12-30	11.16	0	1	8	0	1	0	1	1	0	0	2	0	0	64	20.4	1.05	8	5	229	195	149	96	77	69	101	229	229	439	200
3	0	47	167	82	29.4023	0	0	0	184	736	2063	0	1	0	0	1	1	2020-09-23	2021-02-23	16.82	0	4	14.7	1	1	0	0	0	0	0	2	0	1	94	14.1	1.07	8	7	184	714	403	254	151	121	106	714	714	736	3058
3	0	61	161	67	25.8478	0	0	0	24	41	229	0	0	0	0	1	1	2020-03-18	2020-08-12	20	0	2	3.5	0	1	1	1	0	0	0	2	0	1	72	75.2	1.52	17	8	189	173	201	208	179	146	98	208	208	533	433
1	0	58	165	65	23.8751	1	0	0	104	161	329	0	0	0	0	1	1	2019-09-26	2020-01-10	25.84	0	1	12	1	1	0	0	0	0	0	2	0	1	55	18.8	1.27	9	8	313	141	124	93	66	48	41	313	313	746	146
1	0	69	165	63	23.1405	0	0	0	19	48	211	0	0	0	0	1	1	2018-10-01	2020-11-21	29.95	0	2	4.1	0	1	1	1	0	0	0	2	0	0	66	32.7	1.06	10	6	947	576	438	276	163	105	67	947	947	3057	958
1	0	34	180	110	33.9506	0	0	0	37	58	199	0	0	0	1	1	1	2018-04-01	2019-12-13	32.72	0	2	3.5	0	1	1	1	0	0	0	2	0	1	62	30.6	1.16	10	5	467	277	216	306	288	495	380	495	495	652	122
2	0	39	172	71	23.9995	0	0	0	89	63	177	0	0	1	1	1	0	2021-02-25	2021-02-25	33.71	0	2	4.3	0	1	1	1	0	1	0	2	0	1	73	26.5	1.1	9	5	377	307	279	201	154	168	158	377	377	493	258
2	0	54	170	77	26.6436	1	0	1	38	91	276	0	0	0	0	1	1	2018-07-21	2018-07-30	42.09	0	3	1.5	1	1	0	0	0	0	0	2	0	0	96	23.4	1.47	13	9	549	155	92	56	37	26	22	549	549	1372	319
3	0	50	175	75	24.4898	0	0	0	34	94	337	0	0	1	0	1	0	2019-03-14	2020-05-13	43.44	0	4	10	0	1	0	1	1	0	0	2	0	0	86	28.1	1.15	10	7	1402	755	466	294	182	128	92	1402	1402	5556	937
3	0	47	178	80	25.2493	0	0	0	20	26	214	0	0	0	0	1	1	2018-05-01	2019-09-16	75.12	0	4	8.7	0	1	0	1	1	1	0	2	0	0	157	19.9	1.21	22	6	200	160	79	43	26	14	10	200	200	985	329
4	0	39	170	68	23.5294	0	0	0	63	66	381	0	0	0	0	1	0	2019-12-29	2020-06-30	93.15	0	2	3.9	0	1	1	1	0	1	0	2	0	1	56	37.6	1.17	11	6	256	311	257	209	147	114	56	311	311	490	374
1	0	65	178	78	24.6181	1	0	1	43	57	287	0	0	0	0	1	0	2019-12-01	2020-11-02	168.11	0	4	4.4	1	1	0	0	1	0	0	2	0	1	73	104.4	1.63	19	10	179	64	51	30	17	11	12	179	179	665	124
1	0	50	167	67	24.0238	0	0	0	28	35	296	0	0	0	0	1	1	2020-10-19	2020-10-19	179.88	0	4	3.9	0	1	0	1	1	0	1	2	0	0	72	10.6	1.04	7	9	398	1564	791	462	270	208	164	1564	1564	746	1602
2	0	41	168	55	19.487	0	0	0	225	594	543	0	0	0	0	1	1	2017-11-10	2017-11-10	180.5	0	1	17	1	1	0	0	0	0	0	2	0	1	69	720	1.16	22	8	258	322	149	98	81	72	70	322	322	511	1158
1	1	62	160	49	19.1406	0	0	0	102	273	161	0	0	0	0	1	1	2020-05-07	2020-10-30	2.85	0	1	1.3	1	1	0	0	0	0	0	2	0	0	64	463.3	1.73	25	8	510	322	466	219	148	120	99	510	510	985	180
1	1	52	164	57	21.1927	0	0	1	30	25	324	0	1	0	0	1	0	2018-04-27	2020-09-24	3.25	0	3	10	0	1	0	1	1	1	0	2	0	1	78	23.2	0.97	8	5	1205	#NULL!	#NULL!	#NULL!	#NULL!	#NULL!	#NULL!	#NULL!	957.08	2533	1072
1	1	39	165	59	21.6713	0	0	0	51	61	164	0	0	0	0	1	0	2020-09-18	2021-05-07	7.21	0	1	11.4	0	1	0	1	1	0	0	2	0	0	50	9.3	0.9	6	5	273	180	126	99	76	81	76	273	273	733	148
1	1	64	173	70	23.3887	0	0	0	26	111	300	0	1	0	0	1	1	2017-06-23	2018-12-22	82.03	0	4	4.3	0	1	0	1	0	0	0	2	0	0	53	81	2.68	23	12	593	482	273	146	130	124	86	593	593	1552	352
3	0	46	173	86	28.7347	0	0	0	28	20	151	0	0	1	0	1	1	2016-08-11	2018-04-21	2.55	0	4	7.2	0	1	0	1	0	1	0	3	1	0	125	32.3	1.2	14	9	226	900	766	402	242	175	240	900	900	619	208
4	0	40	165	52	19.1001	0	0	0	38	42	165	0	0	0	0	1	1	2020-07-17	2020-09-29	2.68	0	4	4.4	0	1	0	1	1	1	1	2	1	1	77	16.2	1.05	7	5	320	246	205	129	88	65	54	320	320	738	401
2	0	61	169	66.5	23.2835	0	0	0	285	1735	5850	0	0	0	0	1	1	2015-06-01	2015-07-12	3.07	0	4	12	0	1	0	1	0	0	0	3	1	0	165	237	2.1	31	10	285	#NULL!	#NULL!	#NULL!	#NULL!	#NULL!	#NULL!	#NULL!	957.08	1735	1589
2	0	28	175	78	25.4694	0	0	0	129	65	176	0	1	0	0	1	0	2019-07-30	2021-03-18	6.49	0	2	5	0	1	1	1	1	1	1	3	1	0	78	11	1.05	7	5	1206	1854	1072	753	574	427	300	1854	1854	1677	1659
1	0	54	178	76	23.9869	0	0	0	110	142	224	0	1	0	0	1	0	2019-06-01	2021-03-12	16.56	0	3	4.4	0	1	1	1	0	0	0	2	1	0	84	53.1	1.33	14	7	1176	1044	1287	789	504	323	216	1287	1287	2861	926
3	0	37	181	81	24.7245	0	0	0	53	53	176	0	1	0	0	1	0	2020-05-18	2021-03-08	21.37	0	4	10.1	0	1	0	0	1	0	0	3	1	1	78	9.4	0.94	6	5	324	257	122	124	92	76	66	324	324	2770	610
1	0	51	167	70	25.0995	0	0	0	26	40	213	0	0	0	0	1	0	2021-02-23	2021-02-23	23.49	0	2	3.9	0	1	1	1	0	0	0	3	1	0	159	376.4	1.71	30	10	485	361	319	227	162	110	78	485	485	1078	1313
2	0	53	170	61	21.1073	0	0	0	11	21	178	0	0	0	0	1	0	2020-05-18	2021-03-12	23.86	0	1	15.8	0	1	0	0	1	0	0	3	1	1	88	11.7	1.23	9	6	98	64	45	35	27	20	12	98	98	1101	209
1	0	59	162	59	22.4813	0	0	0	23	49	202	0	1	0	0	1	1	2017-07-19	2017-12-30	25.31	0	1	4	1	1	0	0	0	0	0	3	1	1	95	24.6	1.17	10	5	3009	1305	772	316	116	47	19	3009	3009	14713	3278
1	0	48	162	75	28.578	0	0	0	56	59	536	0	1	0	1	1	0	2019-08-27	2021-05-13	26.13	0	1	17.1	1	1	0	0	1	0	0	2	1	1	73	44.1	1.12	11	8	822	2868	1563	766	322	82	44	2868	2868	2537	1103
1	0	51	168	60	21.2585	0	0	0	36	36	122	0	0	0	0	1	1	2019-07-12	2019-04-17	35.95	0	1	2.5	1	1	0	0	1	1	0	3	1	1	85	37.9	1.24	12	7	123	88	67	57	54	48	43	123	123	302	111
1	0	36	178	68	21.4619	0	0	0	8	28	45	0	0	0	0	1	0	2020-01-01	2020-06-10	56.85	0	4	4	0	1	0	0	1	0	1	3	1	0	48	39.3	1.28	12	8	440	261	170	96	69	105	99	440	440	1218	313
1	0	43	175	65	21.2245	0	0	0	204	216	441	0	0	0	0	1	1	2018-01-11	2017-12-14	91.78	0	1	4.7	1	1	0	0	1	0	0	3	1	0	74	13.7	1.01	7	7	492	431	292	220	145	101	78	492	492	905	698
1	0	47	170	68	23.5294	0	0	0	16	25	241	0	0	0	0	1	0	2019-12-14	2020-12-14	96.53	0	1	5	1	1	0	0	1	1	0	2	1	0	78	17.7	1.19	9	5	381	238	165	113	128	120	54	381	381	601	104
2	0	33	172	68	22.9854	0	0	0	18	38	331	0	0	0	0	1	1	2019-02-27	2019-04-14	117.27	0	1	7	0	1	0	1	0	0	0	3	1	1	84	12.6	1.04	7	5	237	5978	#NULL!	#NULL!	#NULL!	#NULL!	#NULL!	5978	5978	1268	340
1	0	70	156	51	20.9566	0	0	0	7	19	299	0	0	0	0	1	0	2020-10-15	2021-01-21	170.45	0	1	7	0	1	0	1	0	1	0	3	1	0	62	85.9	1.09	13	8	524	893	544	476	383	287	177	893	893	2760	587
4	0	49	158	76	30.4438	1	0	0	42	64	225	0	1	0	0	1	1	2016-03-18	2017-01-06	180.55	0	4	8	0	1	0	1	0	1	0	3	1	0	86	201.6	8.2	39	8	786	507	416	264	174	122	94	786	786	1481	521
1	1	63	165	53	19.4674	0	0	0	41	68	239	0	0	0	0	1	0	2020-09-17	2021-12-21	10.81	0	1	4.4	1	1	0	0	0	1	0	2	1	0	55	11.8	1.1	7	6	425	338	273	174	113	88	68	425	425	1408	495
3	0	69	164	75	27.8852	0	0	1	46	63	243	0	0	0	0	2	0	2021-07-21	2021-07-21	200.7	1	1	1.5	0	0	1	1	0	1	0	2	0	0	54	25.8	9.4	33	6	639	149	271	383	280	168	109	639	639	528	161
4	0	41	159	54	21.3599	0	0	1	39	43	162	0	0	0	0	2	0	2021-02-22	2021-02-22	221.73	1	1	2.5	0	0	1	1	1	1	0	2	0	0	61	17.4	1.06	7	5	626	414	263	214	128	110	105	626	626	913	312
3	0	54	163	58	21.83	0	0	0	8	35	251	0	0	0	0	2	0	2021-04-20	2021-04-20	229.37	1	1	1	0	0	1	1	0	0	0	2	0	0	68	20.3	1.46	11	8	219	113	74	54	36	29	20	219	219	1328	345
2	0	56	163	54	20.3244	0	0	0	27	3	199	0	0	0	0	2	0	2021-03-05	2021-03-05	263.37	1	3	2.3	0	0	1	1	0	1	1	2	0	0	50	21.6	1.18	9	5	137	100	69	53	43	29	30	137	137	262	99
3	0	52	181	60	18.3145	0	0	0	32	44	150	0	1	1	0	2	0	2021-03-11	2021-05-21	428.34	1	1	0.5	0	0	1	1	0	0	0	2	0	0	89	43	1.57	15	9	2270	342	242	196	129	95	54	2270	2270	4890	4067
3	0	51	168	60	21.2585	1	1	0	28	48	327	0	1	0	0	2	0	2021-02-26	2021-02-26	1058.62	1	1	1.3	0	0	1	1	0	0	0	2	0	0	41	11.1	1.16	8	7	1321	841	620	373	250	174	56	1321	1321	3655	3171
1	0	67	160	71	27.7344	1	0	1	18	34	211	0	1	0	0	2	0	2021-08-30	2021-08-30	2292.7	1	2	3	0	0	1	1	0	0	0	2	0	0	90	19.5	1.26	14.5666	#NULL!	1265	1238	742	531	344	198	128	1265	1265	2266	888
2	0	67	162	54	20.5761	0	1	1	17	27	224	0	1	0	0	2	0	2020-12-07	2020-12-07	2809.92	1	1	4.6	0	0	1	1	0	0	0	2	0	1	98	39.7	1.38	14	9	249	175	118	85	51	34	25	249	249	222	287
3	0	43	160	55	21.4844	0	0	0	55	156	206	0	1	1	0	2	0	2020-12-08	2020-12-08	3226.2	1	1	2.9	0	0	1	1	0	0	0	2	0	0	54	471.3	2.06	27	9	462	263	195	135	101	67	43	462	462	1297	225
1	0	54	172	62.5	21.1263	0	0	1	96	48	314	0	0	0	0	2	0	2021-04-06	2021-04-06	10175.8	1	2	0.6	0	0	1	1	1	0	0	2	0	0	87	13.1	0.99	6	5	606	497	315	196	143	107	91	606	606	942	525
4	0	56	158	54	21.6311	0	0	0	101.272	183.668	592.736	0	0	0	0	2	1	2018-01-11	2018-01-11	22094.1	1	2	1	0	0	1	1	0	0	0	2	0	0	45	48.4	1.48	15	12	163	909	582	364	237	180	144	909	909	126	104
1	1	54	157	69	27.993	0	0	0	23	37	286	0	0	0	0	2	0	2021-04-12	2021-04-12	367.96	1	1	3	0	0	1	1	0	0	0	2	0	0	50	107.5	2.31	23	12	451	390	297	190	124	89	58	451	451	473	180
1	0	56	169	67	23.4586	0	0	0	31	52	213	0	0	0	0	2	0	2021-05-17	2021-05-17	347.06	1	1	3	0	0	1	1	0	0	0	3	1	1	63	55.2	1.64	15	10	208	136	97	97	84	60	50	208	208	460	101
3	0	40	166	71.5	25.9472	0	0	0	89	49	286	0	1	0	0	2	0	2021-09-14	2021-09-14	592.61	1	1	1.5	0	0	1	1	1	0	1	3	1	0	96	12.4	0.97	7	5	731	195	123	83	61	46	46	731	731	2316	639
1	0	59	163	65	24.4646	0	0	0	16	18	140	0	1	0	0	2	1	2018-05-16	2018-05-16	1601.59	1	1	1.5	0	0	1	1	0	0	0	3	1	1	94	11	0.97	7	7	1192	4965	3614	2189	877	747	176	4965	4965	2238	704
2	0	52	165	75	27.5482	0	0	0	17	34	288	0	1	0	0	2	1	2021-01-12	2021-01-12	2308.35	1	0	0	0	0	1	1	1	0	0	3	1	0	89.5909	81.6137	1.43266	30	11	1563	4209	1875	684	293	113	92	4209	4209	3458	7520
4	0	37	171	56	19.1512	0	0	0	116	50	183	0	0	0	0	2	0	2021-03-08	2021-03-08	3064.39	1	2	3.1	0	0	1	1	0	1	0	3	1	0	69	20.8	0.96	7	7	358	268	344	202	135	102	72	358	358	687	586
2	0	60	173	70	23.3887	0	0	0	32	40	228	0	1	0	0	2	0	2021-08-10	2021-08-10	22094.1	1	2	3	0	0	1	1	1	0	0	3	1	0	58	46	1.18	12	9	1188	1245	705	484	324	234	194	1245	1245	5685	1055
1	1	67	174	57	18.8268	0	0	0	53	91	128	0	1	0	0	2	1	2018-10-15	2018-10-15	997.38	1	1	2	0	0	1	1	0	0	0	3	1	0	57	349.4	1.47	22	10	1716	253	178	117	78	73	77	1716	1716	7731	1900
3	0	40	175	75	24.4898	1	0	0	20	26	299	0	0	0	0	2	0	2020-12-25	2020-12-25	0.58	0	1	1.5	0	0	1	1	0	0	0	2	0	0	104	13.5	1.45	12	8	198	156	98	55	29	16	11	198	198	997	368
2	0	49	163	68	25.5937	0	0	1	16	20	138	0	1	0	0	2	0	2021-07-19	2021-07-19	1	0	#NULL!	0	0	0	1	1	0	0	0	2	0	0	112	29	1.27	13	8	564	98	59	43	66	41	32	564	564	1277	122
2	0	42	170	70	24.2215	0	0	0	19	23	196	0	1	0	0	2	0	2021-09-27	2021-09-27	1.09	0	2	2	0	0	1	1	0	0	1	2	0	0	70	13.6	1.01	7	5	650	224	149	98	104	95	75	650	650	3636	806
2	0	65	169	71	24.8591	0	0	0	9	13	184	0	0	0	0	2	0	2021-04-26	2021-04-26	1.24	0	1	3.9	0	0	1	1	0	0	1	2	0	0	57	25.5	1.36	8	7	350	187	123	68	48	30	26	350	350	753	105
2	0	59	173	66.8	22.3195	0	0	1	25	46	202	0	0	0	0	2	0	2021-05-02	2021-05-02	1.91	0	1	1.8	0	0	1	1	0	0	0	2	0	0	69	34	1.12	10	7	1163	176	124	98	71	0	0	1163	1163	1643	437
2	0	56	165	60	22.0386	0	0	0	19	27	183	0	1	0	0	2	0	2021-04-12	2021-04-12	1.91	0	1	3.6	0	0	1	1	1	0	0	2	0	0	69	39.5	1.37	13	10	832	390	240	160	109	66	52	832	832	2021	301
3	0	55	167	50	17.9282	0	0	0	29	47	173	0	0	1	0	2	0	2021-07-14	2021-07-14	1.92	0	1	2	0	0	1	1	0	0	0	2	0	0	58	40.7	0.98	33	9	154	79	56	36	30	25	21	154	154	425	88
2	0	45	172	70	23.6614	0	0	0	24	21	175	0	1	0	0	2	0	2021-01-23	2021-01-23	1.94	0	2	2.7	0	0	1	1	0	1	0	2	0	0	77	22.2	1.02	8	5	293	287	182	116	86	59	35	293	293	307	204
2	0	60	170	68	23.5294	0	0	0	44	22	197	0	1	0	0	2	1	2018-06-21	2018-06-21	1.95	0	1	4.3	0	0	1	1	0	0	0	2	0	0	51	22.9	0.98	8	6	1177	1388	801	515	308	195	136	1388	1388	4635	473
2	0	46	165	52.5	19.2837	0	0	0	29	55	147	0	1	0	0	2	0	2021-04-05	2021-04-05	1.96	0	2	2.7	0	0	1	1	0	1	0	2	0	0	90	30.1	1.21	11	7	285	249	156	111	101	81	59	285	285	755	279
3	0	40	162	84	32.0073	0	0	0	35	23	195	0	0	0	0	2	0	2021-03-09	2021-03-09	2.15	0	3	1.4	0	0	1	1	1	0	0	2	0	0	47	25.5	0.88	8	7	1153	93	57	34	21	14	19	1153	1153	1353	1370
4	0	47	171	60	20.5191	0	0	1	48	35	192	0	0	0	0	2	0	2021-03-09	2021-03-09	2.33	0	1	1.3	0	0	1	1	1	0	1	2	0	0	47	23	1.14	9	6	251	261	226	168	166	160	122	261	261	666	521
3	0	48	170	65	22.4913	0	0	0	56	171	332	0	1	0	0	2	0	2021-01-22	2021-06-21	2.38	0	1	3	0	0	1	#NULL!	1	0	0	1	0	0	73	56.5	1.36	14	8	1881	#NULL!	#NULL!	#NULL!	#NULL!	#NULL!	#NULL!	#NULL!	957.08	7520	4990
4	0	41	167	54	19.3625	0	0	0	33	36	325	0	1	0	0	2	0	2021-01-05	2021-01-05	2.56	0	2	2.7	0	0	1	1	1	0	0	2	0	0	71	13.1	0.96	6	5	2617	315	186	118	78	58	43	2617	2617	8627	2998
3	0	55	165	67	24.6097	0	0	0	2	19	147	0	0	0	0	2	0	2021-05-24	2021-05-24	2.83	0	1	1.5	0	0	1	1	1	0	0	0	0	0	63	38	1.58	15	8	701	#NULL!	#NULL!	#NULL!	#NULL!	#NULL!	#NULL!	#NULL!	957.08	1356	833
1	0	36	177	70	22.3435	0	0	0	63	43	189	0	0	0	0	2	0	2020-12-30	2020-12-30	2.93	0	1	4	0	0	1	1	0	1	1	2	0	0	101	12.9	1.09	14.5666	#NULL!	494	302	193	154	109	128	110	494	494	2323	570
1	0	56	172	67	22.6474	0	0	0	20	46	324	0	0	1	0	2	0	2021-04-16	2021-04-16	3.27	0	1	4.3	0	0	1	1	0	0	0	2	0	0	106	376	2.43	30	11	396	405	313	247	178	146	126	405	405	932	844
4	0	47	160	55	21.4844	0	0	1	27	39	322	0	1	0	0	2	0	2021-03-15	2021-03-15	3.43	0	1	2.8	0	0	1	1	0	1	1	2	0	0	55	14	1	6	5	245	712	426	292	231	207	179	712	712	362	181
1	0	31	170	65	22.4913	0	0	0	51	88	196	0	0	0	0	2	0	2021-03-23	2021-03-23	3.47	0	1	6	0	0	1	1	1	1	0	2	0	0	93	16.6	1.05	7	5	294	639	742	533	329	206	144	742	742	554	964
2	0	67	169	57	19.9573	0	0	1	51	33	192	0	1	0	0	2	0	2021-03-01	2021-03-01	3.75	0	2	1.5	0	0	1	1	1	0	0	2	0	0	91	10.1	0.89	6	9	496	477	303	236	212	163	134	496	496	964	308
3	0	61	185	55	16.0701	0	0	0	16	18	178	0	0	0	0	2	0	2021-07-12	2021-07-12	3.81	0	1	3	0	0	1	1	0	1	0	2	0	0	70	20.6	1.4	11	7	210	182	106	67	38	#NULL!	#NULL!	210	210	1979	473
3	0	41	175	70	22.8571	0	0	0	587	1651	4249	0	0	0	0	2	0	2020-11-03	2020-11-03	3.86	0	1	2.7	0	0	1	1	1	0	0	2	0	0	80	15.8	1.14	8	5	513	377	244	168	119	107	123	513	513	1457	409
	0	41	155	55	22.8928	0	0	0	45	39	216	0	1	0	0	2	0	2021-02-03	2021-02-03	4.24	0	2	2	0	0	1	1	0	1	0	2	0	0	80	13.9	1.01	7	7	754	1819	1023	692	454	253	198	1819	1819	1774	2778
3	0	54	166	53	19.2336	0	0	0	11	54	220	0	0	0	0	2	0	2021-08-06	2021-01-15	4.27	0	1	1.5	0	0	1	1	0	0	0	2	0	0	72	53.6	1.34	14	10	1039	382	263	227	187	152	119	1039	1039	4360	4372
3	0	53	168	58	20.5499	1	0	1	68	56	177	0	0	0	0	2	0	2021-07-12	2021-07-12	4.69	0	1	2	0	0	1	1	0	0	0	2	0	0	166	7.4	1.08	30	11	402	259	176	127	71	53	40	402	402	876	225
1	0	66	164	65	24.1672	0	0	0	23	27	213	0	0	0	0	2	0	2021-01-19	2021-01-19	4.79	0	3	2.6	0	0	1	1	1	1	0	2	0	0	72	23.9	1.02	8	5	335	247	183	138	122	82	55	335	335	1148	792
3	0	47	164	73	27.1416	0	0	0	22	38	221	0	0	0	0	2	0	2021-03-03	2021-03-03	4.99	0	2	2.8	0	0	1	1	0	0	0	2	0	0	86	18.7	1.2	9	9	461	350	257	154	109	68	46	461	461	722	370
2	0	59	168	68	24.093	0	0	0	48	31	245	0	1	0	0	2	0	2020-12-21	2020-12-20	5.31	0	1	2	0	0	1	1	0	0	0	2	0	0	72	12.9	0.98	6	7	1261	176	116	90	85	59	52	1261	1261	2729	952
1	0	62	170	74.5	25.7785	0	0	1	18	27	171	0	1	1	0	2	0	2020-12-23	2020-12-23	5.85	0	1	3.1	0	0	1	1	1	1	0	2	0	0	64	24.6	1.34	11	7	40	28	36	60	53	76	93	93	93	50	30
1	0	57	175	52	16.9796	0	0	0	24	31	160	0	0	1	0	2	1	2020-07-10	2020-07-10	6.09	0	1	1.9	0	0	1	1	0	0	0	2	0	0	85	22.8	1.19	9	9	220	1121	766	510	348	220	105	1121	1121	1094	175
2	0	64	178	73	23.04	0	0	1	30	29	225	0	0	0	0	2	0	2021-01-22	2021-07-26	6.58	0	1	2.8	0	0	1	1	0	1	0	2	0	0	64	8.4	1.01	7	5	707	583	344	219	137	108	114	707	707	1646	956
3	0	59	165	52	19.1001	0	0	0	45	45	348	0	0	0	0	2	0	2020-10-06	2020-10-06	6.6	0	2	2	0	0	1	1	1	1	0	2	0	0	106	37	1.24	13	7	422	407	307	228	142	113	84	422	422	1611	634
2	0	56	170	70	24.2215	0	0	0	39	41	170	0	1	0	0	2	1	2018-05-01	2018-05-01	6.77	0	3	2.5	0	0	1	1	0	0	0	2	0	1	51	49.3	1.85	17	9	946	#NULL!	#NULL!	#NULL!	#NULL!	#NULL!	#NULL!	#NULL!	957.08	1345	989
2	0	51	167	103	36.9321	0	0	0	26	46	178	0	1	0	0	2	0	2020-12-08	2020-12-08	6.94	0	2	1.7	0	0	1	1	0	0	0	2	0	0	71	32.8	1.12	10	5	370	231	125	55	41	33	24	370	370	732	748
1	0	50	160	65	25.3906	1	0	0	22	33	152	0	0	0	0	2	0	2020-11-23	2020-11-23	7.11	0	2	2.1	0	0	1	1	0	0	0	2	0	0	66	35.7	1.3	25	7	321	976	607	407	270	216	139	976	976	639	1779
1	0	54	173	70	23.3887	1	0	1	63	44	121	0	0	0	0	2	0	2021-01-01	2021-01-01	7.21	0	1	2	0	0	1	1	1	0	0	2	0	0	64	19.2	1.02	7	6	694	467	275	162	132	112	32	694	694	1401	250
3	0	47	174	66	21.7994	0	0	0	44	35	227	0	0	0	0	2	0	2021-01-18	2021-01-18	8.27	0	1	3	0	0	1	1	1	0	0	1	0	0	92	22.4	1.11	9	10	769	471	356	215	131	78	70	769	769	3696	1438
2	0	60	176	82	26.4721	0	0	0	23	42	186	0	1	1	0	2	0	2021-03-23	2021-03-23	9.74	0	1	4.1	0	0	1	1	0	0	0	2	0	0	74	53.3	1.44	15	7	560	556	350	288	204	137	96	560	560	2006	986
3	0	68	158	55	22.0317	0	1	0	17	41	202	0	0	0	0	2	0	2020-12-06	2020-12-06	11.11	0	1	1	0	0	1	1	0	0	0	2	0	0	76	28.2	1.36	12	7	210	158	116	90	80	69	82	210	210	556	271
4	0	61	173	73	24.3911	0	0	0	52	32	227	0	1	0	0	2	0	2021-01-15	2021-01-15	11.15	0	2	3	0	0	1	1	1	0	0	2	0	0	76	30.6	3.12	21	8	595	470	334	278	210	#NULL!	#NULL!	595	595	739	218
1	0	62	172	65	21.9713	0	0	1	3787	9360	14531	0	1	0	0	2	0	2021-05-01	2021-05-01	11.53	0	2	2.1	0	0	1	1	0	0	0	2	0	0	82	40.9	1.14	11	6	5380	3800	2043	915	419	188	88	5380	5380	9951	3866
2	0	61	173	70	23.3887	1	0	1	33	57	275	0	0	0	0	2	0	2021-04-08	2021-04-08	12.29	0	1	2.8	0	0	1	1	1	0	0	2	0	0	58	71.7	1.37	15	7	253	129	91	90	88	68	37	253	253	296	73
3	0	63	173	60	20.0474	0	0	0	101.272	183.668	592.736	0	0	0	0	2	0	2021-04-21	2021-04-21	13	0	1	2.9	0	0	1	1	0	0	1	2	0	0	87	13.5	0.99	6	5	655	559	346	243	175	124	44	655	655	1656	632
3	0	65	168	54	19.1327	0	0	1	9	37	154	0	0	1	0	2	0	2021-03-04	2021-03-04	13.8	0	1	4.5	0	0	1	1	0	0	0	2	0	0	58	49.4	1.23	14	10	51	48	55	46	30	21	45	55	55	138	97
2	0	60	162	62	23.6244	0	0	0	90	145	235	0	1	0	0	2	0	2020-11-02	2020-11-02	15	0	1	1.2	0	0	1	1	0	0	0	2	0	0	117	114.5	1.55	21	10	1835	528	457	285	179	125	85	1835	1835	6371	1383
3	0	59	168	71	25.1559	0	0	0	28	53	228	0	0	0	0	2	0	2021-04-30	2021-04-30	16.99	0	2	3	0	0	1	1	0	0	0	2	0	1	85	50.4	1.26	13	10	388	236	154	94	67	82	96	388	388	1259	239
1	0	59	165	35	12.8558	0	0	0	101.272	26	163	0	0	1	0	2	0	2021-04-21	2021-04-21	21	0	1	1.5	0	0	1	1	1	0	1	2	0	0	40	13.5	1.16	8	6	230	229	317	289	204	134	98	317	317	455	397
3	0	44	165	70	25.7117	0	0	0	21	39	197	0	0	0	0	2	0	2021-04-08	2021-04-08	25.72	0	1	1.9	0	0	1	1	1	0	0	2	0	0	65	39.9	1.58	15	9	300	266	223	146	116	104	96	300	300	625	297
3	0	48	170	66.5	23.0104	0	0	0	56	87	182	0	1	0	0	2	0	2021-09-13	2021-09-13	28.13	0	1	1.5	0	0	1	1	0	0	0	0	0	0	57	20.1	1.71	13	6	1338	2849	1331	674	292	70	34	2849	2849	4639	995
4	0	42	168	67.5	23.9158	0	0	0	8	21	713	0	0	0	0	2	0	2020-12-08	2020-12-08	30	0	2	2	0	0	1	1	0	0	0	2	0	0	42	46.3	3.06	23	12	152	61	36	30	41	26	17	152	152	411	88
3	0	54	168	55	19.487	0	0	0	101.272	183.668	592.736	0	1	0	0	2	0	2021-07-20	2021-07-20	31.27	0	2	3	0	0	1	1	0	0	0	2	0	0	73	8.6	1.24	9	8	506	98	76	47	50	48	37	506	506	750	297
2	0	49	158	57	22.8329	0	0	0	20	28	161	0	0	0	0	2	0	2020-12-26	2020-12-26	33.39	0	1	1.7	0	0	1	1	1	0	0	2	0	0	83	26.2	1.29	11	9	394	1175	870	545	361	256	183	1175	1175	556	158
1	0	60	172	75	25.3515	1	0	0	53	43	202	0	1	1	1	2	0	2020-12-08	2020-12-08	34	0	2	2.8	0	0	1	1	0	0	0	1	0	0	169	368.8	2.13	33	9	181	123	95	86	69	46	46	181	181	685	846
2	0	61	170	58	20.0692	0	0	0	12	31	234	0	0	0	0	2	0	2021-07-07	2021-07-07	48	0	3	2.5	0	0	1	1	0	0	0	2	0	0	89.5909	81.6137	1.43266	13	10	297	213	146	104	83	58	48	297	297	960	324
1	0	52	170	70	24.2215	0	0	0	39	47	208	0	1	0	0	2	0	2020-12-08	2020-12-08	51.05	0	1	4.8	0	0	1	1	0	0	0	2	0	0	71	45.8	1.47	14	10	404	261	156	113	85	95	69	404	404	875	538
3	0	42	168	52	18.424	0	0	0	21	32	130	0	1	0	0	2	0	2021-07-07	2021-07-07	64.53	0	2	2	0	0	1	1	1	0	0	2	0	1	79	16.7	1.35	30	12	250	141	156	114	77	50	40	250	250	720	193
3	0	69	170	70	24.2215	0	0	1	32	47	184	0	0	0	0	2	0	2020-11-10	2020-11-10	77.57	0	1	1.8	0	0	1	1	1	0	0	2	0	0	69	12.8	1.26	9	7	290	208	143	106	113	108	92	290	290	149	100
4	0	41	172	70	23.6614	0	0	0	30	44	207	0	0	0	0	2	0	2021-04-01	2021-04-01	90.36	0	2	9.3	0	0	0	1	0	0	0	2	0	0	63	18	1.07	7	5	77	115	55	35	31	30	26	115	115	146	296
1	0	52	176	75	24.2123	0	0	0	25	30	262	0	0	0	0	2	0	2021-04-20	2021-04-20	100.5	0	1	2.1	0	0	1	1	1	0	0	2	0	0	64	30.3	1.16	10	6	90	69	58	53	44	33	26	90	90	137	69
4	0	56	163	62.5	23.5237	0	0	0	34	42	205	0	0	0	0	2	0	2021-04-19	2021-04-19	106.9	0	1	2.8	0	0	1	1	0	0	0	2	0	0	73	23.9	1.28	10	6	802	1136	710	352	224	143	91	1136	1136	1959	1176
1	0	56	162	60	22.8624	0	0	0	166	195	275	0	1	0	0	2	0	2021-03-01	2021-03-01	113.29	0	1	3.1	0	0	1	1	0	0	0	2	0	0	68	58.9	1.33	14	11	147	154	148	135	123	90	63	154	154	373	216
1	0	46	158	55	22.0317	0	0	0	15	21	173	0	0	0	1	2	1	2017-02-12	2017-02-11	133.74	0	1	2.5	0	0	1	1	0	0	0	2	0	0	100	18.2	1.33	11	11	88	548	339	270	224	210	184	548	548	214	99
3	0	63	180	90	27.7778	1	0	0	101.272	183.668	592.736	0	0	0	0	2	1	2018-05-04	2018-05-04	154.42	0	1	2.8	0	0	1	1	0	0	0	2	0	0	53	15.4	1.01	7	5	450	169	107	73	58	45	36	450	450	975	340
4	0	53	170	64	22.1453	0	0	0	101.272	183.668	592.736	0	0	0	1	2	0	2021-07-20	2021-07-20	171	0	#NULL!	0	0	0	1	1	0	0	0	2	0	0	89.5909	81.6137	1.02	32	10	577	596	474	385	318	196	144	596	596	869	507
2	1	61	156	57	23.4221	0	0	0	47	45	289	0	1	0	0	2	0	2021-01-12	2021-01-12	2.66	0	1	3	0	0	1	1	0	0	0	2	0	0	63	33.2	1.15	11	7	927	2460	1080	825	468	303	130	2460	2460	2205	1236
2	1	64	162	59	22.4813	0	0	0	24	88	147	0	0	0	0	2	0	2021-07-12	2021-07-12	2.79	0	#NULL!	0	0	0	1	1	0	1	0	0	0	0	66	196.9	1.36	18	10	346	178	112	80	64	43	30	346	346	960	181
1	1	52	160	62	24.2188	0	0	0	362	493	1405	0	0	0	0	2	0	2021-01-27	2021-01-22	3.44	0	1	4	0	0	1	1	0	1	1	2	0	0	69	89.3	1.08	14	9	308	836	643	552	412	308	170	836	836	258	189
2	1	62	175	53	17.3061	0	0	0	15	118	232	0	0	1	0	2	0	2021-06-21	2021-06-21	3.76	0	1	1	0	0	1	1	1	0	0	2	0	0	152	662	2.27	35	10	121	393	278	237	142	108	78	393	393	291	290
1	1	57	157	67	27.1816	0	0	0	19	37	269	0	0	1	0	2	0	2021-03-09	2021-03-09	3.97	0	2	3	0	0	1	1	1	0	0	2	0	0	72	18.7	1.14	8	7	#NULL!	415	289	159	107	82	72	415	415	#NULL!	147
2	1	57	156	60	24.6548	0	0	0	26	52	211	0	0	0	0	2	0	2020-12-08	2020-12-08	4.71	0	1	2.3	0	0	1	1	0	0	0	2	0	0	67	112.5	1.6	19	9	275	143	88	63	44	35	54	275	275	960	239
2	1	57	165	49.5	18.1818	0	0	1	66	150	279	0	1	1	0	2	0	2021-07-05	2021-07-05	7.56	0	2	1.9	0	0	1	1	0	0	0	2	0	1	49	106.3	1.45	17	10	157	116	103	98	81	60	40	157	157	544	170
4	1	58	158	62	24.8358	0	0	1	37	39	152	0	0	0	0	2	0	2021-01-21	2021-01-21	19.57	0	3	1.5	0	0	1	1	0	0	0	2	0	0	368	460	2.62	40	10	177	5295	1396	807	487	234	103	5295	5295	773	263
1	1	47	154	56	23.6128	0	0	0	30	65	227	0	0	0	0	2	0	2021-03-10	2021-03-10	27.82	0	1	2.7	0	0	1	1	0	0	0	2	0	0	49	52.7	1.74	17	11	56	37	30	20	14	10	7	56	56	324	85
2	1	62	173	74	24.7252	0	0	0	11	58	197	0	1	0	1	2	0	2021-05-07	2021-05-07	41.3	0	1	1.8	0	0	1	1	0	0	0	2	0	0	44	299.3	2.34	27	10	268	205	158	149	131	90	68	268	268	672	285
1	1	26	167	67	24.0238	0	0	0	101.272	183.668	592.736	0	0	0	0	2	0	2021-03-12	2021-03-12	68	0	2	1	0	0	1	1	0	0	0	2	0	0	67	19.4	1.79	13	9	758	814	560	470	339	219	160	814	814	871	265
2	0	42	170	69	23.8754	0	0	0	39	39	172	0	1	0	0	2	0	2021-07-05	2021-07-05	1.59	0	1	3	0	0	1	1	0	0	0	3	1	0	67	21.2	1.06	8	7	365	287	165	130	134	115	83	365	365	599	121
3	0	42	172	55.5	18.7601	0	0	0	265	200	265	0	0	0	0	2	0	2021-07-16	2021-07-16	1.6	0	3	2.5	0	0	1	1	1	0	0	3	1	0	80	14.6	1.03	38	9	698	635	429	291	182	143	109	698	698	1586	500
3	0	62	168	71	25.1559	0	0	0	19	28	162	0	1	0	0	2	0	2021-08-20	2021-08-20	1.94	0	3	3	0	0	1	1	1	0	0	3	1	0	81	28.4	1.19	10	5	599	201	230	174	118	84	61	599	599	1026	636
3	0	38	172	55	18.5911	0	0	0	35	29	231	0	1	0	0	2	0	2021-04-13	2021-04-13	3.79	0	2	1.8	0	0	1	1	1	1	0	3	1	0	89	15.2	1.04	7	7	1083	838	535	404	292	218	174	1083	1083	3585	901
1	0	46	168	63	22.3214	0	0	0	23	36	143	0	1	0	0	2	0	2021-01-19	2021-01-19	4.68	0	1	2	0	0	1	1	0	1	0	3	1	0	74	46.6	1.55	15	7	519	1736	1426	1078	587	304	200	1736	1736	505	253
4	0	47	178	75	23.6713	0	0	0	49	65	200	0	0	0	0	2	0	2020-12-21	2020-12-21	6.38	0	1	4.6	0	0	1	1	0	0	0	3	1	0	136	266.4	2.17	30	13	159	98	76	47	50	48	37	159	159	380	105
1	0	62	170	90	31.1419	1	0	0	44	24	180	0	1	0	0	2	0	2021-01-06	2021-01-06	9.02	0	1	5	0	0	1	1	0	1	0	3	1	0	89	28.4	1.1	9	6	976	532	312	223	196	149	111	976	976	4892	1324
2	0	51	178	90	28.4055	0	0	0	38	47	239	0	0	0	0	2	0	2020-12-07	2020-12-07	10.26	0	1	2.8	0	0	1	1	0	0	0	3	1	0	59	26.2	1.39	12	9	565	323	229	153	107	84	70	565	565	1400	250
1	0	48	176	98	31.6374	0	0	0	36	49	204	0	0	0	0	2	0	2021-04-19	2021-04-19	14.31	0	1	1.6	0	0	1	1	0	1	0	3	1	1	57	26	1.01	8	7	697	388	240	198	169	149	111	697	697	1755	260
3	0	52	164	63	23.4236	0	0	0	29	40	178	0	0	0	0	2	0	2020-12-18	2020-12-18	14.99	0	1	3	0	0	1	1	0	0	0	3	1	0	76	70.1	1.82	18	10	822	974	609	347	219	131	80	974	974	1582	401
3	0	61	165	60	22.0386	0	0	0	101.272	183.668	592.736	1	0	0	0	2	1	2016-05-04	2016-05-04	20	0	1	4	0	0	1	1	0	0	0	3	1	0	85	40	1.6	15	8	270	7582	8042	3690	2063	1577	1008	8042	8042	686	344
2	0	53	165	70	25.7117	0	0	0	129	83	212	0	0	0	0	2	0	2021-01-15	2021-01-15	20.74	0	3	0.01	0	0	1	1	0	0	0	3	1	1	92	65.8	1.21	14	10	757	96	50	33	24	24	19	757	757	1180	570
1	0	52	167	65	23.3067	0	0	0	41	57	234	0	1	0	1	2	0	2020-09-14	2020-09-14	66	0	1	2.9	0	0	1	1	0	0	0	3	1	0	232	366	2.17	36	10	477	332	244	193	186	160	165	477	477	2167	851
3	0	61	166	73	26.4915	1	0	0	40	37	253	0	1	0	0	2	0	2020-12-01	2020-12-01	107.3	0	1	5	0	0	1	1	0	0	0	3	1	0	74	28.6	0.97	8	5	2055	#NULL!	#NULL!	#NULL!	#NULL!	#NULL!	#NULL!	#NULL!	957.08	5687	1094
1	0	64	170	59	20.4152	0	0	0	88	266	615	0	0	0	0	2	0	2020-12-30	2020-12-30	108.5	0	3	2.5	0	0	1	1	0	0	0	3	1	0	118	34.5	1.77	18	11	58	#NULL!	#NULL!	#NULL!	#NULL!	#NULL!	#NULL!	#NULL!	957.08	78	52
2	0	46	165	65	23.8751	0	0	0	13	33	143	0	1	0	0	2	0	2021-04-22	2021-04-22	152.06	0	1	3.3	0	0	1	1	1	0	0	3	1	0	57	31.4	1.55	14	5	288	194	127	94	84	86	88	288	288	292	91
1	1	60	158	80	32.0461	1	0	0	35	50	305	0	0	0	0	2	0	2021-07-14	2021-06-03	4.78	0	2	2.5	0	0	1	1	1	1	0	3	1	1	106	18.6	1.3	10	9	674	434	250	166	118	66	47	674	674	973	1430
3	1	58	158	62	24.8358	1	0	0	31	65	396	0	1	0	0	2	1	2020-09-09	2020-09-09	22.57	0	1	2.1	0	0	1	1	0	0	0	3	1	0	126	21.3	1.08	12	8	96	102	106	79	46	26	16	106	106	228	150
2	0	26	170	70	24.2215	0	0	0	44	35	347	0	1	0	0	1	1	2018-11-29	2020-02-08	2428.92	1	1	1.65	0	0	1	1	0	1	0	2	0	0	72	10.8	1.02	7	6	1266	3803	2598	2088	1482	1213	618	3803	3803	2706	1485
1	0	65	170	70	24.2215	0	0	0	63	90	282	0	1	0	0	1	1	2019-02-28	2019-03-17	3859.52	1	1	4	0	0	1	1	0	0	0	2	0	1	169	382.4	2.14	33	13	848	1024	725	486	328	242	177	1024	1024	2836	719
3	0	66	152	50	21.6413	0	0	0	46	132	214	0	0	0	0	1	1	2017-09-14	2017-11-21	28649.2	1	0	0	0	0	1	1	0	0	0	2	0	0	151	412.2	1.48	28	9	295	58	73	63	51	37	36	295	295	714	824
1	0	65	170	72	24.9135	1	0	0	15	51	236	0	0	0	0	1	1	2017-08-18	2017-08-18	541.72	1	3	2.5	0	0	1	1	1	1	0	3	1	1	62	24	1.24	10	6	525	957	548	306	208	72	39	957	957	1371	475
3	0	46	178	84	26.5118	0	0	0	39	73	279	0	1	0	0	1	0	2018-06-01	2021-01-05	1160.48	1	2	3	0	0	1	1	0	0	0	2	1	1	58	14.2	1.05	7	5	484	242	136	88	47	21	10	484	484	4808	631
1	0	41	171	65	22.2291	0	0	0	26	34	316	0	1	0	0	1	1	2016-03-01	2016-10-22	379834	1	3	3	0	0	1	1	0	0	0	3	1	1	191	134.8	2.13	30	8	4339	2160	2008	1054	612	350	148	4339	4339	12669	4107
2	0	51	165	78	28.6501	0	0	0	8	38	180	0	0	0	0	1	0	2019-01-13	2020-09-24	7.04	0	1	4.5	0	0	1	1	1	0	0	2	0	1	143	343	2.17	31	10	204	160	119	94	69	56	45	204	204	683	185
1	0	55	170	68	23.5294	0	0	0	151	150	254	0	0	0	1	1	1	2018-11-01	2020-09-20	11	0	1	2.2	0	0	1	1	0	1	1	2	0	0	93	49.4	1.28	14	7	156	93	71	78	110	176	196	196	196	259	89
3	0	56	180	75	23.1481	0	1	0	66	66	233	0	0	0	0	1	0	2018-01-01	2020-09-22	13.26	0	1	1.2	0	0	1	1	1	0	0	2	0	0	55	14.9	1.11	8	7	654	538	263	201	142	121	104	654	654	1288	934
1	0	52	166	89	32.2979	0	0	0	21	24	275	0	0	0	0	1	0	2020-04-01	2021-01-01	15.28	0	1	0.5	0	0	1	1	0	0	0	2	0	0	186	426.4	1.43	30	11	305	273	239	159	112	76	54	305	305	1314	644
3	0	63	170	64	22.1453	0	0	0	72	78	183	0	0	0	0	1	1	2017-12-01	2018-03-14	18.55	0	1	3.5	0	0	1	1	0	0	0	2	0	1	91	18.3	0.9	7	5	356	218	122	75	64	55	52	356	356	1027	256
1	0	47	165	63	23.1405	0	0	0	49	117	277	0	0	0	0	1	0	2020-08-20	2021-04-26	19.82	0	1	4	0	0	1	1	1	0	0	2	0	0	49	95.7	2.23	22	12	278	173	98	76	76	58	45	278	278	491	154
4	0	49	165	75	27.5482	0	0	0	537	1255	3138	0	0	1	0	1	0	2020-10-21	2020-12-08	33.75	0	1	4.5	0	0	1	1	0	0	0	2	0	0	75	245.5	1.37	20	8	382	214	163	161	105	83	65	382	382	641	136
1	0	66	172	53	17.9151	1	0	0	8	26	25972	0	0	0	0	1	1	2017-08-23	2019-05-21	36.02	0	1	3.7	0	0	1	1	0	0	0	2	0	1	108	42.5	1.48	16	9	333	210	145	106	91	63	48	333	333	314	114
2	0	69	170	65	22.4913	0	0	0	66	42	218	0	0	1	0	1	1	2018-09-01	2019-09-07	83.33	0	2	4	0	0	1	1	0	1	0	2	0	0	66	35.4	1.09	10	6	345	280	186	114	76	49	33	345	345	504	191
2	0	72	167	63	22.5896	0	0	0	46	65	246	0	0	0	0	1	0	2021-03-01	2021-03-01	130.81	0	1	4	0	0	1	1	0	0	0	2	0	0	86	51.6	1.59	16	11	51	30	26	24	38	28	23	51	51	233	96
3	0	43	178	81.5	25.7228	0	0	0	18	29	273	0	1	0	0	1	1	2017-05-12	2018-12-11	152.96	0	2	0.7	0	0	1	1	1	0	1	2	0	0	70	25.9	0.95	8	7	2596	1175	827	395	212	117	72	2596	2596	2419	695
3	0	56	168	60	21.2585	0	0	0	104	288	271	0	0	0	0	1	1	2019-01-03	2019-11-19	154.77	0	1	4	0	0	1	1	0	0	0	2	0	0	90	156.4	1.4	19	11	442	738	604	403	240	142	90	738	738	1293	676
1	1	51	165	55	20.202	0	0	0	74	68	170	0	1	1	0	1	1	2019-12-18	2021-03-01	7.4	0	1	3.5	0	0	1	1	1	0	0	2	0	0	49	12.7	1.02	7	6	1558	#NULL!	#NULL!	#NULL!	#NULL!	#NULL!	#NULL!	#NULL!	957.08	6664	1379
2	1	56	163	56	21.0772	0	0	0	20	29	183	0	0	0	0	1	0	2021-08-20	2021-07-07	173	0	3	2	0	0	1	1	0	0	0	2	0	0	50	29	1.5	30	11	443	225	177	125	79	62	49	443	443	835	171
2	0	64	168	75	26.5731	0	0	0	97	93	190	0	1	0	0	1	1	2019-05-09	2020-03-23	3.36	0	1	3.9	0	0	1	1	1	0	0	2	1	1	59	133.5	1.34	17	9	498	674	437	275	191	180	173	674	674	1548	6026
2	0	65	155	52	21.6441	0	0	0	6	28	231	0	1	0	0	1	1	2017-06-13	2020-04-18	5.65	0	1	4	0	0	1	1	1	0	0	2	1	0	167	117.9	1.78	26	6	291	#NULL!	#NULL!	#NULL!	#NULL!	#NULL!	#NULL!	#NULL!	957.08	948	330
1	0	46	170	61.5	21.2803	0	0	0	601	564	286	0	0	0	0	1	0	2019-03-01	2020-05-28	21.42	0	1	4	0	0	1	1	0	0	0	3	1	0	56	422.1	2.85	30	11	2095	3792	2557	1021	652	415	316	3792	3792	5325	6076
1	0	43	170	80	27.6817	0	0	0	42	47	258	0	1	0	0	1	0	2020-11-18	2021-03-09	28.73	0	3	3	0	0	1	1	0	0	0	3	1	1	81	9.8	0.92	6	7	1536	118	82	100	60	44	30	1536	1536	4101	849
4	0	60	170	71.5	24.7405	0	0	0	42	67	180	0	1	0	0	1	1	2019-05-01	2020-10-19	109.27	0	1	4.5	1	0	1	1	1	0	0	3	1	1	51	115.5	1.21	16	9	247	117	113	50	42	48	63	247	247	610	112
1	1	57	158	50	20.0288	1	0	1	38	27	163	0	0	0	0	1	1	2018-12-29	2019-01-11	4.66	0	3	1.5	0	0	1	1	0	1	0	2	1	0	63	10.5	0.93	6	5	319	56	46	#NULL!	41	29	#NULL!	319	319	571	191
1	1	47	162	51	19.433	0	0	0	27	26	224	0	1	0	0	1	0	2019-12-16	2021-05-07	26.44	0	3	2.5	0	0	1	1	1	1	1	2	1	1	71	15.6	0.99	6	5	1686	836	493	375	263	206	151	1686	1686	4814	1592
[truncated: 48 more columns]
